# Supplementary material for: Genetic architecture of smoking: Evaluating rare variant contribution from deep whole-genome sequencing of up to 26,000 individuals
Source: Research Square preprint supplement (doi:10.21203/rs.3.rs-475149/v1), 2021-05-05
Supplement: Supplementary file 4 [file fe78b2c1d0aef2c87c15a723.docx]

Supplementary Note for:

Genetic architecture of smoking: Evidence for rare variant contribution from deep whole-genome sequencing of up to 26,000 individuals

**1. Definition of terms**

: a general term referring to SNP-based narrow-sense heritability estimate.

: a narrow-sense heritability estimate combined across all LDMS bins in current WGS study.

: a narrow-sense heritability estimate attributable to common variants in current WGS study. This was obtained by summing up estimates for four common variants bins (MAF(.01, .5] including high and low LD bins).

: a narrow-sense heritability estimate attributable to rare variants in current WGS study. This was obtained by summing up estimates for all rare variants bins (MAF(.0001, .01]).

: a narrow-sense heritability estimate based on both close relatives and unrelated individuals in TOPMed sample. This provides an upper-bound for .

: a mean of heritability estimates from permutation trials. A value larger than zero indicates that might be inflated due to confounding by population stratification.

**2. GREML-LDMS-I analysis**

*Sample selection*

To select the European-ancestry sample, we applied two different approaches. First, we applied a two-step procedure, described below, and second an alternative ascertainment strategy1 to evaluate the convergence of the two different approaches. In the two-step procedure, initial set of European genomes were selected by projecting 1000 Genome (1000G) PC loadings onto TOPMed genotypes (freeze 8; autosomes only) and applying K-nearest neighbors classification on 20 projected PCs using open source software FRAPOSA2. This software uses online augmentation-decomposition-transformation (OADP) for projection to avoid potential misalignment and shrinkage bias. To calculate 1000G PC loadings, SNPs common in both 1000G and TOPMed were extracted and pruned for LD using plink 1.9 (--indep-pairwise 100kb 5 0.1) and went through other quality control filters (--geno 0.01, --mind 0.01), resulting in a total of 103,646 variants. Then, genetic PCs for TOPMed sample were calculated using plink 1.9 (--score). Ancestry of TOPMed individuals was assigned based on “votes” of top 20 closest neighbors (uniformly weighted) in 1000G dataset in terms of PC 1-20 scores. As in the original paper2, those assigned probability of being European ancestry greater than .875 made an initial set of European ancestry (EUR sample; N=61,112 for whole EUR sample; N=38,915 for EUR sample having at least one smoking phenotypes). Visual inspection of the PC 1-4 plots of this initial sample suggested possibility of residual heterogeneity within European ancestry sample, thus we further restricted sample via following way: 1), we created four increasingly restrictive samples based on Euclidean distance of PC 1-4 from the vertex (maximum of PC1, minimum of PC2, and PC3-4 values evaluated at the maximum value of PC1). Then, we calculated Euclidean distance from this vertex for each individual and removed outliers having distance greater than 3, 2, 1.5, and 1 times Inter-Quartile Range (IQR), each comprising four increasingly restrictive sample sets. The 1 IQR sample (i.e., most conservative with respect to population structure) was used for our main analyses with the remaining samples reserved for sensitivity analysis.

In an alternative ascertainment scheme, we categorized those whose 1000G projected PC1 and PC2 scores fall within 6 SD of the mean of PC1 and PC2 of Utah residents with Northern and Western European samples (CEU 6SD) in 1000G as European ancestry. Sample size and PC1-4 plots of the resulting samples are presented in Table S1 and Figure S5-6.

*Phenotypes*

We applied the same definition for phenotypes as used in recent GWAS of tobacco use3. Age of smoking initiation (AgeSmk) is a continuous variable indicating age at which an individual started smoking regularly. Cigarettes per day (CigDay) is an ordinal variable with 5 bins (1-5) with higher numbers indicating higher average number of cigarettes smoked per day, either as a current smoker or former smoker. Specifically, each bin indicates following quantity: bin1 (1~5), bin2 (6~15), bin3 (16~25), bin4 (26~35), bin5 (36+). Individuals who never smoked was set to missing. Smoking cessation (SmkCes) is a binary phenotype: current (case=1) versus former smoker (control=0). Smoking initiation (SmkInit) is also a binary variable measuring whether one reports ever being a regular smoker in their life versus (case=1) never smoker (control=0). Table S2 shows cohort-wide and cohort-level descriptive statistics of four smoking phenotypes. For quantitative traits, i.e., AgeSmk and CigDay, rank-based inverse normalization was applied to the residuals taken after regressing out age, age^2, sex, and their interaction terms. Figure S7 shows the distribution of AgeSmk and CigDay after such inverse-rank-based normalization.

The relationship among four smoking phenotypes was explored using linear mixed-effects regression (Table S1). For each phenotype, they were regressed on age, sex, and the two remaining smoking phenotypes (except for SmkInit) as fixed covariates and cohort as a random intercept. Note that the relation between SmkInit and other variables could not be estimated because every individual reporting AgeSmk, CigDay, and SmkCes, were lifetime smokers. In R(v3.63), we used lme function in nlme(v3.1)and glmer function in lme4(v1.1).

*Genetic Relatedness Matrix (GRM) and LD scores*

We created six GRMs using GCTAv1.92 for each phenotype. Variants were assigned to following six bins based on their MAF and LD scores: high LD variants with MAF .05 ~ .5 (MAF 5-50% HI), low LD variants with MAF .05 ~ .5 (5-50% LO), high LD variants with MAF .01 ~ .05 (1-5% HI), low LD variants with MAF .01 ~ .05 (1-5% LO), variants with MAF .01 ~ .001 (0.1-1%), variants with MAF .001 ~ .0001 (0.01-0.1%). High/low LD variants were defined as being higher or lower than the median LD score of variants belonging to the respective bin. We calculated LD scores within each chromosome using GCTA software (default ld-wind 10,000kb) on a total of 47,600,816 variants from unrelated European samples who were selected through abovementioned PC- and relatedness filtering procedures and combined across different phenotypes. A summary of the LD scores for each bin (smallest, ) is presented in Table S3. We estimated heritability without zero constraint to obtain unbiased estimates.

*Sensitivity analysis*

We tested sensitivity of our results by comparing results across different combinations of ancestry-filtering thresholds (1 IQR, 1.5 IQR, 2 IQR, 3 IQR), relatedness cut-offs (0.05, 0.025) and phenotype transformation methods (for quantitative traits only). Details for how we created sample sets with increasing ancestral variation was provided in *Phenotype* section. We compared three phenotype transformations for AgeSmk: 1) inverse rank-based transformation of the residuals after adjusting age, age^2, sex, and their interaction terms for phenotype in original scale, 2) log-transforming phenotype and normalizing residuals with respect to mean and SD after regressing out the covariates mentioned above on the log-transformed phenotype, 3) same as 2) except that we removed outliers (outside 3SD range; N=189 removed) before conducting nomarlization. For CigDay, we applied the first two transformation methods described earlier. The third transformation was not applied since no outliers were found for CigDay. Finally, we compared our heritability estimates from main analysis (1 IQR sample) with those obtained from alternative sample set (CEU 6SD sample). We ran GREML-LDMS-I for each condition with the same set of covariates, settings, and procedures.

*Local Permutation analysis*

We estimated potential amount of residual population stratification using permutation method. First, we calculated genetic distance between i-th and j-th individual using following formula: , where PCs are principal components calculated with common variants and is eigenvalue corresponding to the k-th PCs. Then, we generated a list of permutations by randomly exchanging i-th individual with one of their 100 nearest neighbors which includes themselves. More detailed procedure of generating permutation is described elsewhere4. Similar to this study, we dropped the first 50 permutations and sampled each permutation list with a step of 5 to ensure relative independence between the permutation lists. Taking semi-empirical approach, we calculated mean and standard deviations of 200 permutation trials and used them to construct empirical null distribution, Mean heritability departing from zero would indicate potential confounding bias by population stratification. We conducted one-tailed z-test for 6 bins of each phenotype to test whether is significantly different from zero. We also tested heritability estimates from main analysis against empirical null distribution (Figure 1, Table S5).

*Pedigree-based narrow-sense heritability*

For pedigree-based analysis, we only included cohorts having more than 10 pairs of close relatives (i.e., those related greater than .375) from 1 IQR European samples which has not been filtered by relatedness yet. This is to prevent the relatedness structure from becoming too low in which case heritability estimates can be deflated5. Then, we removed one in the pairs related greater than .8 to prevent duplicates or monozygotic twins (which are indistinguishable) being accidentally included. Next, we created GRM with variants of MAF greater than .05. We set pairs related less than .05 as 0 in the same GRM to prevent deflation of heritability estimate This resulted in a GRM based on 6th degree, or closer, relatives, including all relative pairs excluded in the SNP heritability analyses described throughout this report, as well as unrelated individuals. Such a GRM includes additive effects of common variants, but also additive effects of all variants in haplotypes shared among relatives, including common and rare SNPs. This modified GRM was entered as a random effect together with two other random effects, a cohort effect and shared environment effect. We created the shared environment GRM by setting pairs related greater than .375 as 1 and 0 otherwise. We entered the same set of fixed effects (demographic, sequencing center, and genetic PCs) used in our main SNP-based heritability analysis. We found that fitting both genetic and shared environment GRMs did not converge or produced non-sensible estimates due to strong dependence between the genetic GRM and the shared environment GRM. Therefore, we reported results from models with only the genetic and cohort random effects, understanding that the estimates can be upwardly biased due to shared environment effect.

**References**

1. Recovery of trait heritability from whole genome sequence data | bioRxiv.

2. Zhang, D., Dey, R., and Lee, S. (2020). Fast and robust ancestry prediction using principal component analysis. Bioinformatics *36*, 3439–3446.

3. Liu, M., Jiang, Y., Wedow, R., Li, Y., Brazel, D.M., Chen, F., Datta, G., Davila-Velderrain, J., McGuire, D., Tian, C., et al. (2019). Association studies of up to 1.2 million individuals yield new insights into the genetic etiology of tobacco and alcohol use. Nature Genetics *51*, 237–244.

4. Taking population stratification into account by local permutations in rare-variant association studies on small samples | bioRxiv.

5. Zaitlen, N., Kraft, P., Patterson, N., Pasaniuc, B., Bhatia, G., Pollack, S., and Price, A.L. (2013). Using Extended Genealogy to Estimate Components of Heritability for 23 Quantitative and Dichotomous Traits. PLOS Genetics *9*, e1003520.

**3. Study-specific Acknowledgements and Disclaimer**

| Study’s short name | Study name | PI | Study-specific acknowledgements details | TOPMed accession number |
| --- | --- | --- | --- | --- |
| ARIC | Atherosclerosis Risk in Communities Study VTE cohort | Eric.Boerwinkle@uth.tmc.edu | Whole genome sequencing (WGS) for the Trans-Omics in Precision Medicine (TOPMed) program was supported by the National Heart, Lung and Blood Institute (NHLBI). WGS for “NHLBI TOPMed: Atherosclerosis Risk in Communities (ARIC)” (phs001211) was performed at the Baylor College of Medicine Human Genome Sequencing Center (HHSN268201500015C and 3U54HG003273-12S2) and the Broad Institute for MIT and Harvard (3R01HL092577-06S1). Centralized read mapping and genotype calling, along with variant quality metrics and filtering were provided by the TOPMed Informatics Research Center (3R01HL-117626-02S1). Phenotype harmonization, data management, sample-identity QC, and general study coordination, were provided by the TOPMed Data Coordinating Center (3R01HL- 120393-02S1). We gratefully acknowledge the studies and participants who provided biological samples and data for TOPMed.  The Genome Sequencing Program (GSP) was funded by the National Human Genome Research Institute (NHGRI), the National Heart, Lung, and Blood Institute (NHLBI), and the National Eye Institute (NEI). The GSP Coordinating Center (U24 HG008956) contributed to cross-program scientific initiatives and provided logistical and general study coordination. The Centers for Common Disease Genomics (CCDG) program was supported by NHGRI and NHLBI, and whole genome sequencing was performed at the Baylor College of Medicine Human Genome Sequencing Center (UM1 HG008898 and R01HL059367).  The Atherosclerosis Risk in Communities study has been funded in whole or in part with Federal funds from the National Heart, Lung, and Blood Institute, National Institutes of Health,  Department of Health and Human Services (contract numbers HHSN268201700001I, HHSN268201700002I, HHSN268201700003I, HHSN268201700004I and HHSN268201700005I). The authors thank the staff and participants of the ARIC study for their important contributions. | phs001211 |
| BioMe | Mount Sinai BioMe Biobank | ruth.loos@mssm.edu | This research was supported by NIH grant X01HL134588. | phs001644 |
| CHS | Cardiovascular Health Study | psaty@u.washington.edu | This CHS research was supported by NHLBI contracts HHSN268201200036C, HHSN268200800007C, HHSN268201800001C, N01HC55222, N01HC85079, N01HC85080, N01HC85081, N01HC85082, N01HC85083, N01HC85086, 75N92021D00006; and NHLBI grants U01HL080295, R01HL087652, R01HL105756, R01HL103612, R01HL120393, and U01HL130114 with additional contribution from the National Institute of Neurological Disorders and Stroke (NINDS). Additional support was provided through R01AG023629 from the National Institute on Aging (NIA). A full list of principal CHS investigators and institutions can be found at CHS-NHLBI.org. The provision of genotyping data was supported in part by the National Center for Advancing Translational Sciences, CTSI grant UL1TR001881, and the National Institute of Diabetes and Digestive and Kidney Disease Diabetes Research Center (DRC) grant DK063491 to the Southern California Diabetes Endocrinology Research Center.  Dr. Psaty serves on the Steering Committee of the Yale Open Data Access Project funded by Johnson & Johnson. | phs001368 |
| CHS_VTE | Cardiovascular Health Study | heckbert@uw.edu | Please contact the study PI. | phs001368 |
| COPDGene/Eclipse | Genetic Epidemiology of COPD Study | ed.silverman@channing.harvard.edu | This research was supported by NIH grants U01 HL089856 and U01 HL089897. ECLIPSE was supported by GSK.  Dr. Silverman has received grant support from GSK and Bayer. | phs000951 |
| EOCOPD | Boston Early-Onset COPD Study | ed.silverman@channing.harvard.edu | The Boston Early-Onset COPD Study was supported by R01 HL113264 and U01 HL089856 from the National Heart, Lung, and Blood Institute. | phs000946 |
| FHS | Framingham Heart Study | vasan@bu.edu | This investigation includes data From the Framingham Heart Study of the National Heart Lung and Blood Institute of the National Institutes of Health and Boston University School of Medicine. This project has been funded in part with Federal funds from the National Heart, Lung, and Blood Institute, National Institutes of Health, Department of Health and Human Services, under Contract No. 75N92019D00031.  The Framingham Heart Study (FHS) acknowledges the support of Contracts NO1-HC-25195, HHSN268201500001I and 75N92019D00031 from the National Heart, Lung and Blood Institute and grant supplement R01 HL092577-06S1 for this research. We also acknowledge the dedication of the FHS study participants without whom this research would not be possible. Dr. Vasan is supported in part by the Evans Medical Foundation and the Jay and Louis Coffman Endowment from the Department of Medicine, Boston University School of Medicine.  The views expressed in this manuscript are those of the authors and do not necessarily represent the views of the National Heart, Lung, and Blood Institute; the National Institutes of Health; or the U.S. Department of Health and Human Services. | phs000974 |
| GeneSTAR | Genetic Studies of Atherosclerosis Risk | rmathias@jhmi.edu | GeneSTAR was supported by the National Institutes of Health/National Heart, Lung, and Blood Institute (U01 HL72518, HL087698, HL112064) and by a grant from the National Institutes of Health/National Center for Research Resources (M01- R000052) to the Johns Hopkins General Clinical Research Center. | phs001218 |
| GOLDN/HyperGEN | Genetics of Lipid Lowering Drugs and Diet Network | donna.arnett@uky.edu | This research was supported by NIH grant 1R01 HL091357. | phs001359 |
| HCHS_SOL | Hispanic Community Health Study - Study of Latinos | Robert.Kaplan@einsteinmed.org | This research was supported by NIH grants R01HG010297 and U01HG007416. All HCHS/SOL participants provided informed consent, and the study was approved by the Institutional Review Board of local field centers, coordinating center and laboratories.  The Hispanic Community Health Study/Study of Latinos is a collaborative study supported by contracts from the National Heart, Lung, and Blood Institute (NHLBI) to the University of North Carolina (HHSN268201300001I / N01-HC-65233), University of Miami (HHSN268201300004I / N01-HC-65234), Albert Einstein College of Medicine (HHSN268201300002I / N01-HC-65235), University of Illinois at Chicago – HHSN268201300003I / N01-HC-65236 Northwestern Univ), and San Diego State University (HHSN268201300005I / N01-HC-65237). The following Institutes/Centers/Offices have contributed to the HCHS/SOL through a transfer of funds to the NHLBI: National Institute on Minority Health and Health Disparities,National Institute on Deafness and Other Communication Disorders, National Institute of Dental and Craniofacial Research, National Institute of Diabetes and Digestive and Kidney Diseases, National Institute of Neurological Disorders and Stroke, NIH Institution-Office of Dietary Supplements. | phs001395 |
| HVH | Heart and Vascular Health Study | heckbert@uw.edu | The Heart and Vascular Health Study was supported by grants HL068986, HL085251, HL095080, and HL073410 from the National Heart, Lung, and Blood Institute. | phs000993 |
| IPF | Whole Genome Sequencing in Familial and Sporadic Idiopathic Pulmonary Fibrosis | David.Schwartz@ucdenver.edu | Please contact the study PI. | phs001607 |
| Mayo_VTE | Mayo Clinic Venous Thromboembolism Study | mandrade@mayo.edu | Please contact the study PI. | phs001402 |
| MESA | Multi-Ethnic Study of Atherosclerosis | jrotter@lundquist.org | Whole genome sequencing (WGS) for the Trans-Omics in Precision Medicine (TOPMed) program was supported by the National Heart, Lung and Blood Institute (NHLBI). WGS for “NHLBI TOPMed: Multi-Ethnic Study of Atherosclerosis (MESA)” (phs001416.v1.p1) was performed at the Broad Institute of MIT and Harvard (3U54HG003067-13S1). Centralized read mapping and genotype calling, along with variant quality metrics and filtering were provided by the TOPMed Informatics Research Center (3R01HL-117626-02S1, contract HHSN268201800002I). Phenotype harmonization, data management, sample-identity QC, and general study coordination, were provided by the TOPMed Data Coordinating Center (3R01HL-120393; U01HL-120393; contract HHSN268180001I). The MESA projects are conducted and supported by the National Heart, Lung, and Blood Institute (NHLBI) in collaboration with MESA investigators. Support for MESA is provided by contracts 75N92020D00001, HHSN268201500003I, N01-HC-95159, 75N92020D00005, N01-HC-95160, 75N92020D00002, N01-HC-95161, 75N92020D00003, N01-HC-95162, 75N92020D00006, N01-HC-95163, 75N92020D00004, N01-HC-95164, 75N92020D00007, N01-HC-95165, N01-HC-95166, N01-HC-95167, N01-HC-95168, N01-HC-95169, UL1-TR-000040, UL1-TR-001079, and UL1-TR-001420.  Also supported in part by the National Center for Advancing Translational Sciences, CTSI grant UL1TR001881, and the National Institute of Diabetes and Digestive and Kidney Disease Diabetes Research Center (DRC) grant DK063491 to the Southern California Diabetes Endocrinology Research Center. | phs001416 |
| MPP | Malmo Preventative Project | gustav@broadinstitute.org | J. Gustav Smith was supported by grants from the Swedish Heart-Lung Foundation (2016-0134, 2016-0315 and 2019-0526), the Swedish Research Council (2017-02554), the European Research Council (ERC-STG-2015-679242), the Crafoord Foundation, Skåne University Hospital, the Scania county, governmental funding of clinical research within the Swedish National Health Service, a generous donation from the Knut and Alice Wallenberg foundation to the Wallenberg Center for Molecular Medicine in Lund, and funding from the Swedish Research Council (Linnaeus grant Dnr 349-2006-237, Strategic Research Area Exodiab Dnr 2009-1039) and Swedish Foundation for Strategic Research (Dnr IRC15-0067) to the Lund University Diabetes Center. | phs001544 |
| PMBB_AF | Early-onset Atrial Fibrillation in the Penn Medicine BioBank Cohort | rader@mail.med.upenn.edu  Scott.Damrauer@uphs.upenn.edu | The Penn Medicine BioBank is funded by a gift from the Smilow family, the National Center for Advancing Translational Sciences of the National Institutes of Health under CTSA Award Number UL1TR001878, and the Perelman School of Medicine at the University of Pennsylvania.  SMD is supported by IK2-CX001780. This publication does not represent the views of the Department of Veterans Affairs or the United States Government.  Dr. Damrauer had research support to University of Pennsylvania from RenalytixAI and personal fees from Calico Labs, both outside the current work. | phs001601 |
| SAFS | Whole Genome Sequencing to Identify Causal Genetic Variants Influencing CVD Risk - San Antonio Family Studies | john.blangero@utrgv.edu | This research was supported by NIH grant R01 HL113323. | phs001215 |
| SARP | Severe Asthma Research Program | dameyers@email.arizona.edu | Please contact the study PI. | phs001446 |
| walk_PHaSST | Treatment of Pulmonary Hypertension and Sickle Cell Disease with Sildenafil Therapy | ladwinmt@upmc.edu | We thank the investigators of the Walk-PHasst study and the patients who participated in the study. We also thanks the walk-PHaSST clinical site team: Albert Einstein College of Medicine: Jane Little and Verlene Davis; Columbia University: Robyn Barst, Erika Rosenzweig, Margaret Lee and Daniela Brady; UCSF Benioff Children's Hospital Oakland: Claudia Morris, Ward Hagar, Lisa Lavrisha, Howard Rosenfeld, and Elliott Vichinsky; Children’s Hospital of Pittsburgh of UPMC: Regina McCollum; Hammersmith Hospital, London: Sally Davies, Gaia Mahalingam, Sharon Meehan, Ofelia Lebanto, and Ines Cabrita; Howard University: Victor Gordeuk, Oswaldo Castro, Onyinye Onyekwere, Vandana Sachdev, Alvin Thomas, Gladys Onojobi, Sharmin Diaz, Margaret Fadojutimi-Akinsiku, and Randa Aladdin; Johns Hopkins University: Reda Girgis, Sophie Lanzkron and Durrant Barasa; NHLBI: Mark Gladwin, Greg Kato, James Taylor, Wynona Coles, Catherine Seamon, Mary Hall, Amy Chi, Cynthia Brenneman, Wen Li, and Erin Smith; University of Colorado: Kathryn Hassell, David Badesch, Deb McCollister and Julie McAfee; University of Illinois at Chicago: Dean Schraufnagel, Robert Molokie, George Kondos, Patricia Cole-Saffold, and Lani Krauz; National Heart & Lung Institute, Imperial College London: Simon Gibbs. Thanks also to the data coordination center team from Rho, Inc.: Nancy Yovetich, Rob Woolson, Jamie Spencer, Christopher Woods, Karen Kesler, Vickie Coble, and Ronald W. Helms. We also thank Dr. Yingze Zhang for directing the Walk-PHasst repository and Dr. Mehdi Nouraie for maintaining the Walk-PHasst database and Dr. Jonathan Goldsmith as a NIH program director for this study. Special thanks to the volunteers who participated in the Walk-PHaSST study. This project was funded with federal funds from the NHLBI, NIH, Department of Health and Human Services, under contract HHSN268200617182C. This study is registered at www.clinicaltrials.gov as NCT00492531. | phs001514 |
| WHI | Women's Health Initiative | clk@fredhutch.org | The WHI program is funded by the National Heart, Lung, and Blood Institute, National Institutes of Health,  U.S. Department of Health and Human Services through contracts HHSN268201600018C,  HHSN268201600001C, HHSN268201600002C, HHSN268201600003C, HHSN268201600004C, S10OD028685. | phs001237 |

**4. TOPMed Omics Support Table**

| TOPMed Accession # | TOPMed Study Short Name | TOPMed Phase | TOPMed Project | Omics Center Short Name | Omics Support | Omics Type |
| --- | --- | --- | --- | --- | --- | --- |
| phs001211 | ARIC | 2 | VTE | Baylor | 3U54HG003273-12S2 / HSN268201500015C | WGS |
| phs001644 | BioMe | 3 | BioMe | Baylor | HHSN268201600033I | WGS |
| phs001644 | BioMe | 3 | BioMe | MGI | HHSN268201600037I | WGS |
| phs001368 | CHS | 3 | CHS | Baylor | HHSN268201600033I | WGS |
| phs001368 | CHS VTE | 2 | VTE | Baylor | 3U54HG003273-12S2 / HHSN268201500015C | WGS |
| phs000951 | COPDGene | 2.5 | COPD | Broad Genomics | HHSN268201500014C | WGS |
| phs000951 | COPDGene | 1 | COPD | NWGC | 3R01HL089856-08S1 | WGS |
| phs000951 | COPDGene | 2 | COPD | Broad Genomics | HHSN268201500014C | WGS |
| phs001472 | ECLIPSE | 3 | ECLIPSE | MGI | HHSN268201600037I | WGS |
| phs000946 | EOCOPD | 1 | COPD | NWGC | 3R01HL089856-08S1 | WGS |
| phs000974 | FHS | 1 | FHS | Broad Genomics | 3U54HG003067-12S2 | WGS |
| phs001218 | GeneSTAR | legacy | GeneSTAR | Illumina | R01HL112064 | WGS |
| phs001218 | GeneSTAR | 2 | GeneSTAR | Psomagen | 3R01HL112064-04S1 | WGS |
| phs001359 | GOLDN | 2 | GOLDN | NWGC | 3R01HL104135-04S1 | WGS |
| phs001395 | HCHS_SOL | 3 | HCHS_SOL | Baylor | HHSN268201600033I | WGS |
| phs001293 | HyperGEN | 2 | HyperGEN_GENOA | NWGC | 3R01HL055673-18S1 | WGS |
| phs000993 | HVH | 1 | AFGen | Broad Genomics | 3R01HL092577-06S1 | WGS |
| phs001607 | IPF | 3 | IPF | MGI | HHSN268201600037I | WGS |
| phs001416 | MESA AA_CAC | 2 | AA_CAC | Broad Genomics | HHSN268201500014C | WGS |
| phs001544 | MPP | 2.4 | AFGen | Broad Genomics | 3UM1HG008895-01S2 | WGS |
| phs001601 | PMBB_AF | 2.4 | AFGen | Broad Genomics | 3UM1HG008895-01S2 | WGS |
| phs001215 | SAFS | 1 | SAFS | Illumina | 3R01HL113323-03S1 | WGS |
| phs001215 | SAFS | legacy | SAFS | Illumina | R01HL113322 | WGS |
| phs001446 | SARP | 2 | SARP | NYGC Genomics | HHSN268201500016C | WGS |
| phs001402 | Mayo_VTE | 2 | VTE | Baylor | 3U54HG003273-12S2 / HSN268201500015C | WGS |
| phs001514 | walk_PHaSST | 2 | walk_PHaSST | Baylor | HHSN268201500015C | WGS |
| phs001237 | WHI | 2 | WHI | Broad Genomics | HHSN268201500014C | WGS |

**5. Full TOPMed Banner Authorship list**

Full TOPMed Banner authorship list can be found here: https://www.nhlbiwgs.org/topmed-banner-authorship
