# Supplementary material for: Genetic architecture of smoking: Evaluating rare variant contribution from deep whole-genome sequencing of up to 26,000 individuals
Source: Research Square preprint supplement (doi:10.21203/rs.3.rs-475149/v1), 2021-05-05
Supplement: Supplementary file 5 [file 0670d3139f51626b68d5caef.xlsx]

## Sheet: S1 Sample size
Table S1. Sample size for each analytic stage
			Method to Select Samples Based on Ancestry
			1IQR	1.5IQR			2IQR	3IQR	CEU 6SD
AgeSmk			16432	16916			17297	17800	16862
			15249	15658			15975	16397	15579
			14749	15133			15432	15706	15052
CigDay			17313	17809			18205	18761	17751
			16039	16458			16789	17251	16380
			15434	15832			16138	16434	15748
SmkCes			20441	21037			21503	22167	20950
			18597	19073			19439	19668	18978
			17872	18319			18662	18988	18223
SmkInit			32611	33523			34209	35295	33371
			27831	28480			28957	29758	28344
			26347	26958			27402	27884	26812
Note. Column indicates ancestry filtering thresholds and method. Row indicates relatedness thresholds where pi [0,1] means sample size witout any relatedness filtering.

## Sheet: S2 Phenotype regression
Table S2. Linear mixed-effects model
Age of Smoking Initiation (AgeSmk)							Cigarettes per Day (CigDay)							Smoking Cessation (SmkCes)						Note.
Fixed effect	Beta	SE	df	t	pval		Fixed effect	Beta	SE	df	t	pval		Fixed effect	Beta	SE	Z	pval		Beta	beta coefficient from linar mixed model (for AgeSmk and CigDay) and generalized mixed linear model (for SmkCes)
Intercept	14.871	0.459557	14210	32.3595	< 2e-16		Intercept	3.48386	0.102856	14210	33.8714	< 2e-16		Intercept	3.32256	0.814689	4.078	4.54e-05		SE	standard error of beta coefficients
CigDay	-0.56445	0.0329201	14210	-17.1461	< 2e-16		AgeSmk	-0.035944	0.00209275	14210	-17.1753	< 2e-16		AgeSmk	0.022789	0.004645	4.906	9.28e-07		df	degree of freedom
SmkCes	0.384652	0.0778339	14210	4.94196	< 2e-16		SmkCes	-0.129671	0.019608	14210	-6.61317	< 2e-16		CigDay	-0.124443	0.019223	-6.474	9.57e-11		t	t statistics
Age	0.075505	0.0044896	14210	16.8177	< 2e-16		Age	0.004588	0.00113915	14210	4.02724	0.0001		Age	-0.082649	0.002629	-31.438	< 2e-16		pval	p-value
Sex	0.91882	0.0776428	14210	11.8339	< 2e-16		Sex	-0.373368	0.0194126	14210	-19.2334	< 2e-16		Sex	0.053389	0.042194	1.265	0.206		SD of intercepts	standard deviation of random intercepts
Random effect	SD of intercepts	SD of residuals					Random effect	SD of intercepts	SD of residuals					Random effect	SD of intercepts					SD of residuals	standard deviation of residuals
Cohort	1.14701	4.06712					Cohort	0.226474	1.02562					Cohort	2.568					Intercept	Fixed effects intercept
																				AgeSmk	(normalized) age of smoking initiation
																				CigDay	(normalized) cigarettes per day
																				SmkCes	0=former smoker, 1=current smoker
																				Sex	0=male, 1=female

## Sheet: S3 Cohort descriptives
Table S3.Cohort-level descriptive statistics
Age of Smoking Initiation								Cigarettes per Day								Smoking Cessation							Smoking Initiation
	Age (M)	Age (SD)	Sex (%Female)	Age of Initiation (M)	Age of Initiation (SD)	N			Age (M)	Age (SD)	Sex (% Female)	Cigarettes per Day (M)	Cigarettes per Day (SD)	N			Age (mean)	Age (SD)	Sex (% Female)	Smoking Cessation (% Cases)	N			Age (M)	Age (SD)	Sex (% Female)	Smoking Initiation (% Cases)	N		Note.
ARIC	54.4	5.7	0.46	18.8	4.8	2898		ARIC	54.4	5.7	0.46	2.9	1.1	2820		ARIC	54.4	5.7	0.47	0.4	2828		ARIC	54.3	5.7	0.55	0.6	4304		Age (M)	mean of age
BioMe	62	12.3	0.32	17.9	5.3	137		BioMe	63.7	12.7	0.33	2.9	1.3	113		BioMe	61.8	12.3	0.32	0.21	144		BioMe	58.6	13.1	0.39	0.53	270		Age (SD)	standard deviation of age
COPDGene	62.1	8.8	0.48	17	4.1	5420		Boston	47.9	4.1	0.76	3.6	1	54		Boston	47.9	4.1	0.76	0.15	54		Boston	47.9	4.1	0.77	1	53		Sex (% Female)	percentage of female participants
ECLIPSE	62.3	7.9	0.38	16.9	3.9	1703		CHS	71.9	4.9	0.46	2.7	1.1	961		CHS	72	4.9	0.47	0.2	999		CHS	72.7	5.5	0.58	0.54	1736		N	sample size
FHS	39.6	9.6	0.56	17.8	3.2	568		COPDGene	62.1	8.8	0.48	3.5	1	5411		COPDGene	62.1	8.8	0.48	0.39	5392		COPDGene	62.1	8.8	0.48	0.99	5399		Age of Initiation (M)	mean of Age of Smoking Initiation
GeneSTAR	49.1	13	0.52	17.5	3.6	176		ECLIPSE	62.3	7.8	0.39	3.1	1	1527		ECLIPSE	62.3	7.9	0.38	0.39	1696		ECLIPSE	62.3	7.9	0.38	1	1725		Age of Initiation (SD)	standard deviation of Age of Smoking Initiation
GOLDN	53.1	15.2	0.46	16.7	3.9	89		FHS	39.3	9.3	0.53	2.9	1.2	630		FHS	39.1	10.7	0.51	0.57	822		FHS	39.6	10.8	0.55	0.62	1058		Cigarettes per Day (M)	mean of binned Cigarettes per Day
IPF	64.7	9.6	0.33	18.6	5.1	209		GeneSTAR	41.4	11.6	0.59	2.6	1	90		GeneSTAR	49.2	13	0.52	0.33	180		GeneSTAR	49.8	12.8	0.59	0.54	273		Cigarettes per Day (SD)	standard deviation of binned Cigarettes per Day
MESA	60.9	9.6	0.48	17.6	3.5	579		GOLDN	53	14.7	0.44	2.8	1.6	55		GOLDN	51.7	15.4	0.44	0.19	106		GOLDN	51.8	15.6	0.52	0.29	206		Smoking Cessation (% Cases)	percentage of current smokers
MPP	63.2	5.7	0.07	21.3	6.6	58		IPF	64.7	9.7	0.32	2.8	1.1	209		HCHS_SOL	49.5	10.1	0.73	0.45	11		HCHS_SOL	46.3	12.4	0.61	0.61	18		Smoking Initiation (% Cases)	percentage of ever smoker
WHI	66.9	6.4	1	19.8	3.9	2911		MESA	61.2	9.7	0.47	2.8	1.2	681		HVH	62.5	11.6	0.32	0.17	265		HVH	62.3	12.1	0.35	0.47	553
Total	60.5	9.9	0.57	17.99	4.34	14748		MPP	62.9	5.6	0.05	2.6	0.9	65		IPF	65	8.9	0.25	0.08	486		IPF	65.3	9.1	0.29	0.69	778
								WHI	67	6.3	1	2.7	1.2	2809		MESA	61.1	9.7	0.49	0.2	701		MESA	61.4	9.8	0.53	0.55	1211
								Total	61.1	10.2	0.56	3.04	1.12	15425		MPP	63	5.4	0.06	0.21	71		MPP	63.5	5.5	0.07	0.66	106
																PMBB_AF	58.8	7.9	0.29	0.17	104		PMBB_AF	57.6	8.7	0.26	0.48	218
`																SARP	45.8	14.1	0.6	0	154		SARP	42.9	14.5	0.65	0.22	689
																VTE	52.2	16.5	0.43	0.59	192		VTE	53.8	16.6	0.43	0.62	302
																WHI	66.6	6.5	1	0.15	3666		WHI	67.1	6.5	1	0.49	7441
																Total	60.8	10.7	0.56	0.31	17871		Total	61.2	11.3	0.64	0.66	26340

## Sheet: S4 LD scores
Table S4. Summary of LD scores for unrelated European sample								Note.
Bin	5-50% - HI	5-50% - LO	1-5% - HI	1-5% - LO	0.1-1%	0.01-0.1%		5-50% - HI	Variants with MAF 5-50% and high LD
# of variants	3092454	3092475	1341068	1341071	5395579	21108704		5-50% - LO	Variants with MAF 5-50% and low LD
Mean	301.67	79.04	159.15	36.7	44.77	40.21		1-5% - HI	Variants with MAF 1-5% and high LD
SD	370.09	28.19	154.88	12.24	81.15	106.04		1-5% - LO	Variants with MAF 1-5% and low LD
								0.1-1%	Variants with MAF 0.1-1%
								0.01-0.1%	Variants with MAF 0.01-0.1%

## Sheet: S5 h2_pedigree cohorts
Table S5-1. Sample size per cohort for h2_pedigree analysis
	Age of Smoking Initiation	Cigarettes per Day	Smoking Cessation	Smoking Initiation
ARIC	3374	3342	3384	5711
CHS				2310
COPDGene	5604	5603	5604	5680
ECLIPSE	1835	1628	1838	1878
FHS	1033	1174	1663	3024
GeneSTAR	337	141	358	796
GOLDN	162	92	198	785
MESA			768	1362
WHI				7809
Total	12345	11980	13813	29355
Table S5-2. Number of related pairs per cohort for h2_pedigree analysis
	Total_N_pairs	pi_hat > 0.375	0.18 < pi_hat < 0.375	0.05 < pi_hat < 0.18	0.025 < pi_hat < 0.05	pi_hat < 0.025
ARIC	16304905	46	83	980	2547	16301249
CHS	2666895	29	15	185	437	2666229
COPDGene	16128360	15	11	39	417	16127878
ECLIPSE	1762503	52	8	28	191	1762224
FHS	4570776	2309	1622	2772	1473	4562600
GeneSTAR	316410	635	398	639	21	314717
GOLDN	307720	774	659	634	111	305542
MESA	926841	19	3	8	48	926763
WHI	30486336	13	4	30	870	30485419
Note. The number of related pairs was calculated based on Smoking Initiation sample (N=29,355).

## Sheet: S6 h2_SNP
Table S6. h2SNP estimates for four smoking phenotypes.
Phenotype	MAF/LD	Variance/h2SNP	h2SNP_SE	Ancestral filter	Relatedness threshold	N	Test_against_permuted_null
AgeSmk	Cohort	0.101906	0.050068	1IQR	0.025	14747	-
AgeSmk	MAF 5-50% - HI	0.014187	0.010268	1IQR	0.025	14747	0.317311
AgeSmk	MAF 5-50% - LO	-0.006121	0.023604	1IQR	0.025	14747	0.70766
AgeSmk	MAF 1-5% - HI	0.003145	0.01055	1IQR	0.025	14747	1
AgeSmk	MAF 1-5% - LO	0.082346	0.038044	1IQR	0.025	14747	0.0266767
AgeSmk	MAF 0.1-1%	-0.04269	0.042621	1IQR	0.025	14747	0.396535
AgeSmk	MAF 0.01-0.1%	0.259287	0.059126	1IQR	0.025	14747	0.00157769
AgeSmk	Common (MAF 1-5%)	0.094	0.04	1IQR	0.025	14747	0.017097
AgeSmk	Rare (MAF 0.01-1%)	0.217	0.067	1IQR	0.025	14747	0.0473302
AgeSmk	Total	0.31	0.075	1IQR	0.025	14747	0.00368299
CigDay	Cohort	0.120294	0.052983	1IQR	0.025	15425	-
CigDay	MAF 5-50% - HI	0.011023	0.009842	1IQR	0.025	15425	0.266521
CigDay	MAF 5-50% - LO	0.092246	0.023435	1IQR	0.025	15425	0.000288961
CigDay	MAF 1-5% - HI	-0.015151	0.009472	1IQR	0.025	15425	0.161513
CigDay	MAF 1-5% - LO	-0.000816	0.035208	1IQR	0.025	15425	0.768668
CigDay	MAF 0.1-1%	0.083064	0.046159	1IQR	0.025	15425	0.0801183
CigDay	MAF 0.01-0.1%	-0.024022	0.043361	1IQR	0.025	15425	0.24952
CigDay	Common (MAF 1-5%)	0.087	0.038	1IQR	0.025	15425	0.0516612
CigDay	Rare (MAF 0.01-1%)	0.059	0.056	1IQR	0.025	15425	0.467059
CigDay	Total	0.146	0.062	1IQR	0.025	15425	0.0321246
SmkCes	Cohort	0.084581	0.033635	1IQR	0.025	17871	-
SmkCes	MAF 5-50% - HI	0.008969	0.012525	1IQR	0.025	17871	0.404657
SmkCes	MAF 5-50% - LO	0.05669	0.028779	1IQR	0.025	17871	0.0718606
SmkCes	MAF 1-5% - HI	-0.013579	0.011827	1IQR	0.025	17871	0.488744
SmkCes	MAF 1-5% - LO	0.023138	0.045297	1IQR	0.025	17871	0.600411
SmkCes	MAF 0.1-1%	0.032172	0.056708	1IQR	0.025	17871	0.738883
SmkCes	MAF 0.01-0.1%	0.146833	0.066596	1IQR	0.025	17871	0.00906068
SmkCes	Common (MAF 1-5%)	0.075	0.048	1IQR	0.025	17871	0.0801183
SmkCes	Rare (MAF 0.01-1%)	0.177	0.079	1IQR	0.025	17871	0.0525669
SmkCes	Total	0.252	0.087	1IQR	0.025	17871	0.00910442
SmkInit	Cohort	0.288173	0.092497	1IQR	0.025	26340	-
SmkInit	MAF 5-50% - HI	0.030183	0.010398	1IQR	0.025	26340	0.000288961
SmkInit	MAF 5-50% - LO	0.072001	0.022475	1IQR	0.025	26340	0.00120331
SmkInit	MAF 1-5% - HI	0.015148	0.010462	1IQR	0.025	26340	0.0347628
SmkInit	MAF 1-5% - LO	0.048226	0.03383	1IQR	0.025	26340	0.317311
SmkInit	MAF 0.1-1%	0.048328	0.042986	1IQR	0.025	26340	0.232039
SmkInit	MAF 0.01-0.1%	0.024152	0.050611	1IQR	0.025	26340	0.889538
SmkInit	Common (MAF 1-5%)	0.169	0.038	1IQR	0.025	26340	5.48168e-06
SmkInit	Rare (MAF 0.01-1%)	0.074	0.062	1IQR	0.025	26340	0.250582
SmkInit	Total	0.242	0.069	1IQR	0.025	26340	2.13771e-05
Note. Variance/h2SNP estimates for binary traits (SmkCes, SmkInit) were presented on liability scale (Lee et al. 2012) with following prevalences estimated in UKB sample (Evans et al. preprint) : 0.15 and 0.42 for SmkCes and SmkInit, respectively. Test_against_permuted_null column shows probability (p-value) that the corresponding Variance/h2SNP is likely to be drawn from permuted null distributi…

## Sheet: S7 h2_SNP Functional anno
Table S7. Rare h2SNP for high/low impact functional bins.
Pheno	Source	Variance/h2SNP	h2SNP_SE	Ancestral heterogeneity	Relatedness threshold	N
AgeSmk	Cohort	0.101749	0.049998	1IQR	0.025	14747
AgeSmk	MAF 5-50% - HI	0.014132	0.010267	1IQR	0.025	14747
AgeSmk	MAF 5-50% - LO	-0.006311	0.023608	1IQR	0.025	14747
AgeSmk	MAF 1-5% - HI	0.002994	0.010542	1IQR	0.025	14747
AgeSmk	MAF 1-5% - LO	0.082125	0.038043	1IQR	0.025	14747
AgeSmk	MAF 0.1-1% - High Impact	0.00777	0.015329	1IQR	0.025	14747
AgeSmk	MAF 0.1-1% - Low Impact	-0.046967	0.043016	1IQR	0.025	14747
AgeSmk	MAF 0.01-0.1% - High Impact	0.010543	0.039841	1IQR	0.025	14747
AgeSmk	MAF 0.01-0.1% - Low Impact	0.251307	0.063651	1IQR	0.025	14747
AgeSmk	Common (MAF 1-5%)	0.093	0.04	1IQR	0.025	14747
AgeSmk	Rare (MAF 0.01-1%)	0.223	0.069	1IQR	0.025	14747
AgeSmk	Total	0.316	0.077	1IQR	0.025	14747
CigDay	Cohort	0.120165	0.052942	1IQR	0.025	15425
CigDay	MAF 5-50% - HI	0.011181	0.00985	1IQR	0.025	15425
CigDay	MAF 5-50% - LO	0.093116	0.023454	1IQR	0.025	15425
CigDay	MAF 1-5% - HI	-0.014987	0.009469	1IQR	0.025	15425
CigDay	MAF 1-5% - LO	0.00017	0.035201	1IQR	0.025	15425
CigDay	MAF 0.1-1% - High Impact	-0.007336	0.012817	1IQR	0.025	15425
CigDay	MAF 0.1-1% - Low Impact	0.091406	0.047051	1IQR	0.025	15425
CigDay	MAF 0.01-0.1% - High Impact	-0.043495	0.029442	1IQR	0.025	15425
CigDay	MAF 0.01-0.1% - Low Impact	-0.002541	0.046323	1IQR	0.025	15425
CigDay	Common (MAF 1-5%)	0.089	0.038	1IQR	0.025	15425
CigDay	Rare (MAF 0.01-1%)	0.038	0.057	1IQR	0.025	15425
CigDay	Total	0.128	0.063	1IQR	0.025	15425
SmkCes	Cohort	0.084503	0.03361	1IQR	0.025	17871
SmkCes	MAF 5-50% - HI	0.008922	0.012524	1IQR	0.025	17871
SmkCes	MAF 5-50% - LO	0.056852	0.028782	1IQR	0.025	17871
SmkCes	MAF 1-5% - HI	-0.01344	0.01184	1IQR	0.025	17871
SmkCes	MAF 1-5% - LO	0.022523	0.045309	1IQR	0.025	17871
SmkCes	MAF 0.1-1% - High Impact	-0.002682	0.018046	1IQR	0.025	17871
SmkCes	MAF 0.1-1% - Low Impact	0.034219	0.057756	1IQR	0.025	17871
SmkCes	MAF 0.01-0.1% - High Impact	0.01914	0.042331	1IQR	0.025	17871
SmkCes	MAF 0.01-0.1% - Low Impact	0.135917	0.070095	1IQR	0.025	17871
SmkCes	Common (MAF 1-5%)	0.074	0.048	1IQR	0.025	17871
SmkCes	Rare (MAF 0.01-1%)	0.185	0.081	1IQR	0.025	17871
SmkCes	Total	0.259	0.089	1IQR	0.025	17871
SmkInit	Cohort	0.28243	0.091301	1IQR	0.025	26340
SmkInit	MAF 5-50% - HI	0.030942	0.010456	1IQR	0.025	26340
SmkInit	MAF 5-50% - LO	0.07309	0.022547	1IQR	0.025	26340
SmkInit	MAF 1-5% - HI	0.015801	0.010529	1IQR	0.025	26340
SmkInit	MAF 1-5% - LO	0.048391	0.033987	1IQR	0.025	26340
SmkInit	MAF 0.1-1% - High Impact	0.00915	0.013932	1IQR	0.025	26340
SmkInit	MAF 0.1-1% - Low Impact	0.038988	0.04374	1IQR	0.025	26340
SmkInit	MAF 0.01-0.1% - High Impact	-0.024047	0.029435	1IQR	0.025	26340
SmkInit	MAF 0.01-0.1% - Low Impact	0.031179	0.053029	1IQR	0.025	26340
SmkInit	Common (MAF 1-5%)	0.169	0.056	1IQR	0.025	26340
SmkInit	Rare (MAF 0.01-1%)	0.056	0.095	1IQR	0.025	26340
SmkInit	Total	0.225	0.104	1IQR	0.025	26340
Note. Variance/h2SNP estimates for binary traits (SmkCes, SmkInit) were presetned on liability scale (Lee et al. 2012) with following prevalences calculated in UKB sample (Luke et al. preprint) : 0.15 and 0.42, respectively.

## Sheet: S8 Permutation analysis
Table S8. h2_SNP estimates from 200 permutation trials
Phenotype	Source	N	h2	5%-quantile	95%-quantile	SD	p-value (Z-test against zero)
Age of Smoking Initiation	Cohort	14747	0.101614	0.100343	0.102878	0.000771018	< 2.22e-16
Age of Smoking Initiation	MAF 5-50% - HI	14747	0.00021738	-0.01691	0.0168176	0.0100205	0.5
Age of Smoking Initiation	MAF 5-50% - LO	14747	-0.00114037	-0.0408213	0.0368568	0.0239537	0.516618
Age of Smoking Initiation	MAF 1-5% - HI	14747	0.000267155	-0.0160335	0.0183949	0.0106493	0.5
Age of Smoking Initiation	MAF 1-5% - LO	14747	-0.00222037	-0.0616843	0.060513	0.0369547	0.521554
Age of Smoking Initiation	MAF 0.1-1%	14747	-0.000554535	-0.0784243	0.0760042	0.0456067	0.508672
Age of Smoking Initiation	MAF 0.01-0.1%	14747	0.10156	0.0175801	0.176647	0.0499842	0.0206752
Age of Smoking Initiation	Common (MAF 1-5%)	14747	-0.0028762	-0.060551	0.0650098	0.0388983	0.530658
Age of Smoking Initiation	Rare (MAF 0.01-1%)	14747	0.101005	0.00576765	0.201011	0.0602406	0.0461553
Age of Smoking Initiation	Total	14747	0.0981289	-0.0148358	0.240966	0.0725815	0.0897225
Cigarettes per Day	Cohort	15425	0.121612	0.120171	0.122655	0.000767038	< 2.22e-16
Cigarettes per Day	MAF 5-50% - HI	15425	0.000983919	-0.0139311	0.0145473	0.00885305	0.5
Cigarettes per Day	MAF 5-50% - LO	15425	0.00547066	-0.0333994	0.0433021	0.0240493	0.41207
Cigarettes per Day	MAF 1-5% - HI	15425	-0.000612717	-0.0153795	0.0161195	0.0099818	0.5
Cigarettes per Day	MAF 1-5% - LO	15425	0.00874876	-0.0515523	0.0645602	0.0337737	0.393876
Cigarettes per Day	MAF 0.1-1%	15425	0.0125065	-0.0493328	0.0743427	0.0400208	0.373943
Cigarettes per Day	MAF 0.01-0.1%	15425	0.0141205	-0.0418455	0.0680879	0.0333757	0.28774
Cigarettes per Day	Common (MAF 1-5%)	15425	0.0145906	-0.0425285	0.0771809	0.0366381	0.341854
Cigarettes per Day	Rare (MAF 0.01-1%)	15425	0.026627	-0.0372772	0.0958805	0.0443009	0.245884
Cigarettes per Day	Total	15425	0.0412176	-0.0343962	0.123567	0.0494066	0.186225
Smoking Cessation	Cohort	17871	0.0894993	0.089015	0.0900225	0.000315	< 2.22e-16
Smoking Cessation	MAF 5-50% - HI	17871	-0.000162291	-0.0190535	0.0196355	0.0115769	0.5
Smoking Cessation	MAF 5-50% - LO	17871	0.00569678	-0.043415	0.0557995	0.0302109	0.42074
Smoking Cessation	MAF 1-5% - HI	17871	-0.000800582	-0.0221707	0.0194435	0.0128627	0.530658
Smoking Cessation	MAF 1-5% - LO	17871	-0.00210765	-0.0718017	0.0689677	0.0418396	0.51899
Smoking Cessation	MAF 0.1-1%	17871	0.0104561	-0.0897967	0.103654	0.0595112	0.433816
Smoking Cessation	MAF 0.01-0.1%	17871	0.0434977	-0.0236638	0.113015	0.0410535	0.14714
Smoking Cessation	Common (MAF 1-5%)	17871	0.00262626	-0.0723478	0.071003	0.0443457	0.47282
Smoking Cessation	Rare (MAF 0.01-1%)	17871	0.0539538	-0.055639	0.163291	0.0649926	0.203052
Smoking Cessation	Total	17871	0.05658	-0.074004	0.168596	0.074091	0.22057
Smoking Initiation	Cohort	26340	0.282109	0.281309	0.282926	0.000489079	< 2.22e-16
Smoking Initiation	MAF 5-50% - HI	26340	0.00059782	-0.0125003	0.0143121	0.00817026	0.450262
Smoking Initiation	MAF 5-50% - LO	26340	0.00177423	-0.0279192	0.0391476	0.0211331	0.462063
Smoking Initiation	MAF 1-5% - HI	26340	0.00129407	-0.0150641	0.0155766	0.00946871	0.455764
Smoking Initiation	MAF 1-5% - LO	26340	0.0158659	-0.0336091	0.0765953	0.0341845	0.318967
Smoking Initiation	MAF 0.1-1%	26340	0.00113399	-0.060694	0.0704074	0.0405738	0.490271
Smoking Initiation	MAF 0.01-0.1%	26340	0.0148759	-0.0425102	0.0768944	0.0360189	0.338461
Smoking Initiation	Common (MAF 1-5%)	26340	0.019532	-0.0376517	0.073693	0.0328548	0.272237
Smoking Initiation	Rare (MAF 0.01-1%)	26340	0.0160099	-0.0600726	0.0992741	0.0469225	0.366768
Smoking Initiation	Total	26340	0.0355419	-0.0442468	0.114007	0.0481488	0.226627
Note. 5% and 95% quantile of the heritaility estimates from permutaiton trials are preseted in 5%-quantile and 95%-quantile columns. We tested mean heritability (h2) against zero with Z=(h2-0)/SD. Pvalues for this test are presented in the p-value column.

## Sheet: S9 h2_pedigree
Table S9-1. h2_pedigree using multiple cohorts
	N	Cohort	Cohort_SE	h2	h2_SE			Note.
AgeSmk	12345	0.1	0.05	0.35	0.07			N	Sample size
CigDay	11980	0.08	0.07	0.18	0.07			Cohort	Proportion of variance attributed to cohort
SmkCes	10429	0.08	0.06	0.18	0.07			Cohort_SE	SE of the proportion of variance attributed to cohort
SmkInit	15654	0.46	0.22	0.29	0.05			h2	Estimated upper bound for narrow-sense heritability
								h2_SE	SE for the estimated upper bound for narrow-sense heritability
Table S9-2. h2_pedigree using FHS
	N	h2	h2_SE
AgeSmk	1033	0.23	0.1
CigDay	1174	0.24	0.1
SmkCes	1663	0.2	0.09
SmkInit	3024	0.3	0.06

## Sheet: S10 h2_SNP Sensitivity
Table S10. h2SNP estimates from sensitivity analysis
Phenotype	Phenotype transformation	MAF/LD	N	h2SNP	SE	Ancestral heterogeneity	Relatedness threshold	Sample selection
AgeSmk	IVRT	Cohort	16396	0.103736	0.050669	3IQR	0.05	Two-step
AgeSmk	IVRT	MAF 5-50% - HI	16396	0.014914	0.009404	3IQR	0.05	Two-step
AgeSmk	IVRT	MAF 5-50% - LO	16396	0.001083	0.021335	3IQR	0.05	Two-step
AgeSmk	IVRT	MAF 1-5% - HI	16396	-0.001586	0.00946	3IQR	0.05	Two-step
AgeSmk	IVRT	MAF 1-5% - LO	16396	0.073445	0.034371	3IQR	0.05	Two-step
AgeSmk	IVRT	MAF 0.1-1%	16396	-0.00569	0.041243	3IQR	0.05	Two-step
AgeSmk	IVRT	MAF 0.01-0.1%	16396	0.134447	0.04133	3IQR	0.05	Two-step
AgeSmk	IVRT	Common (MAF 1-5%)	16396	0.088	0.036	3IQR	0.05	Two-step
AgeSmk	IVRT	Rare (MAF 0.01-1%)	16396	0.129	0.051	3IQR	0.05	Two-step
AgeSmk	IVRT	Total	16396	0.217	0.059	3IQR	0.05	Two-step
AgeSmk	IVRT	Cohort	16396	0.103856	0.050747	3IQR	0.025	Two-step
AgeSmk	IVRT	MAF 5-50% - HI	16396	0.014992	0.009411	3IQR	0.025	Two-step
AgeSmk	IVRT	MAF 5-50% - LO	16396	0.000731	0.021329	3IQR	0.025	Two-step
AgeSmk	IVRT	MAF 1-5% - HI	16396	-0.001456	0.00946	3IQR	0.025	Two-step
AgeSmk	IVRT	MAF 1-5% - LO	16396	0.074788	0.034337	3IQR	0.025	Two-step
AgeSmk	IVRT	MAF 0.1-1%	16396	-0.003769	0.04104	3IQR	0.025	Two-step
AgeSmk	IVRT	MAF 0.01-0.1%	16396	0.119318	0.040721	3IQR	0.025	Two-step
AgeSmk	IVRT	Common (MAF 1-5%)	16396	0.089	0.036	3IQR	0.025	Two-step
AgeSmk	IVRT	Rare (MAF 0.01-1%)	16396	0.116	0.051	3IQR	0.025	Two-step
AgeSmk	IVRT	Total	16396	0.205	0.059	3IQR	0.025	Two-step
AgeSmk	IVRT	Cohort	15974	0.108397	0.052837	2IQR	0.05	Two-step
AgeSmk	IVRT	MAF 5-50% - HI	15974	0.015696	0.009692	2IQR	0.05	Two-step
AgeSmk	IVRT	MAF 5-50% - LO	15974	0.001603	0.021751	2IQR	0.05	Two-step
AgeSmk	IVRT	MAF 1-5% - HI	15974	0.000618	0.009695	2IQR	0.05	Two-step
AgeSmk	IVRT	MAF 1-5% - LO	15974	0.091765	0.035239	2IQR	0.05	Two-step
AgeSmk	IVRT	MAF 0.1-1%	15974	-0.0224	0.04118	2IQR	0.05	Two-step
AgeSmk	IVRT	MAF 0.01-0.1%	15974	0.169508	0.046024	2IQR	0.05	Two-step
AgeSmk	IVRT	Common (MAF 1-5%)	15974	0.11	0.037	2IQR	0.05	Two-step
AgeSmk	IVRT	Rare (MAF 0.01-1%)	15974	0.147	0.055	2IQR	0.05	Two-step
AgeSmk	IVRT	Total	15974	0.257	0.063	2IQR	0.05	Two-step
AgeSmk	IVRT	Cohort	15431	0.103285	0.050271	2IQR	0.025	Two-step
AgeSmk	IVRT	MAF 5-50% - HI	15431	0.012368	0.009733	2IQR	0.025	Two-step
AgeSmk	IVRT	MAF 5-50% - LO	15431	-0.000677	0.022593	2IQR	0.025	Two-step
AgeSmk	IVRT	MAF 1-5% - HI	15431	0.002038	0.010107	2IQR	0.025	Two-step
AgeSmk	IVRT	MAF 1-5% - LO	15431	0.086244	0.036492	2IQR	0.025	Two-step
AgeSmk	IVRT	MAF 0.1-1%	15431	-0.039679	0.042493	2IQR	0.025	Two-step
AgeSmk	IVRT	MAF 0.01-0.1%	15431	0.183222	0.047394	2IQR	0.025	Two-step
AgeSmk	IVRT	Common (MAF 1-5%)	15431	0.1	0.039	2IQR	0.025	Two-step
AgeSmk	IVRT	Rare (MAF 0.01-1%)	15431	0.144	0.057	2IQR	0.025	Two-step
AgeSmk	IVRT	Total	15431	0.244	0.065	2IQR	0.025	Two-step
AgeSmk	IVRT	Cohort	15657	0.104288	0.051215	1.5IQR	0.05	Two-step
AgeSmk	IVRT	MAF 5-50% - HI	15657	0.017531	0.010008	1.5IQR	0.05	Two-step
AgeSmk	IVRT	MAF 5-50% - LO	15657	0.000579	0.022275	1.5IQR	0.05	Two-step
AgeSmk	IVRT	MAF 1-5% - HI	15657	0.001003	0.009898	1.5IQR	0.05	Two-step
AgeSmk	IVRT	MAF 1-5% - LO	15657	0.081	0.035921	1.5IQR	0.05	Two-step
AgeSmk	IVRT	MAF 0.1-1%	15657	-0.021835	0.04093	1.5IQR	0.05	Two-step
AgeSmk	IVRT	MAF 0.01-0.1%	15657	0.188733	0.049696	1.5IQR	0.05	Two-step
AgeSmk	IVRT	Common (MAF 1-5%)	15657	0.1	0.038	1.5IQR	0.05	Two-step
AgeSmk	IVRT	Rare (MAF 0.01-1%)	15657	0.167	0.059	1.5IQR	0.05	Two-step
AgeSmk	IVRT	Total	15657	0.267	0.067	1.5IQR	0.05	Two-step
AgeSmk	IVRT	Cohort	15132	0.100599	0.049264	1.5IQR	0.025	Two-step
AgeSmk	IVRT	MAF 5-50% - HI	15132	0.014145	0.01004	1.5IQR	0.025	Two-step
AgeSmk	IVRT	MAF 5-50% - LO	15132	-0.004438	0.023066	1.5IQR	0.025	Two-step
AgeSmk	IVRT	MAF 1-5% - HI	15132	0.003019	0.010328	1.5IQR	0.025	Two-step
AgeSmk	IVRT	MAF 1-5% - LO	15132	0.076811	0.037169	1.5IQR	0.025	Two-step
AgeSmk	IVRT	MAF 0.1-1%	15132	-0.042758	0.041262	1.5IQR	0.025	Two-step
AgeSmk	IVRT	MAF 0.01-0.1%	15132	0.193103	0.050759	1.5IQR	0.025	Two-step
AgeSmk	IVRT	Common (MAF 1-5%)	15132	0.09	0.039	1.5IQR	0.025	Two-step
AgeSmk	IVRT	Rare (MAF 0.01-1%)	15132	0.15	0.06	1.5IQR	0.025	Two-step
AgeSmk	IVRT	Total	15132	0.24	0.068	1.5IQR	0.025	Two-step
AgeSmk	IVRT	Cohort	15246	0.105158	0.051913	1IQR	0.05	Two-step
AgeSmk	IVRT	MAF 5-50% - HI	15246	0.017342	0.010235	1IQR	0.05	Two-step
AgeSmk	IVRT	MAF 5-50% - LO	15246	-0.00233	0.022801	1IQR	0.05	Two-step
AgeSmk	IVRT	MAF 1-5% - HI	15246	0.000607	0.01013	1IQR	0.05	Two-step
AgeSmk	IVRT	MAF 1-5% - LO	15246	0.089403	0.036913	1IQR	0.05	Two-step
AgeSmk	IVRT	MAF 0.1-1%	15246	-0.023597	0.042001	1IQR	0.05	Two-step
AgeSmk	IVRT	MAF 0.01-0.1%	15246	0.216133	0.054134	1IQR	0.05	Two-step
AgeSmk	IVRT	Common (MAF 1-5%)	15246	0.105	0.039	1IQR	0.05	Two-step
AgeSmk	IVRT	Rare (MAF 0.01-1%)	15246	0.193	0.063	1IQR	0.05	Two-step
AgeSmk	IVRT	Total	15246	0.298	0.07	1IQR	0.05	Two-step
AgeSmk	IVRT	Cohort	14747	0.101723	0.049999	1IQR	0.025	Two-step
AgeSmk	IVRT	MAF 5-50% - HI	14747	0.014276	0.010289	1IQR	0.025	Two-step
AgeSmk	IVRT	MAF 5-50% - LO	14747	-0.005837	0.023632	1IQR	0.025	Two-step
AgeSmk	IVRT	MAF 1-5% - HI	14747	0.003098	0.010561	1IQR	0.025	Two-step
AgeSmk	IVRT	MAF 1-5% - LO	14747	0.081197	0.038066	1IQR	0.025	Two-step
AgeSmk	IVRT	MAF 0.1-1%	14747	-0.039041	0.043024	1IQR	0.025	Two-step
AgeSmk	IVRT	MAF 0.01-0.1%	14747	0.202309	0.054937	1IQR	0.025	Two-step
AgeSmk	IVRT	Common (MAF 1-5%)	14747	0.093	0.04	1IQR	0.025	Two-step
AgeSmk	IVRT	Rare (MAF 0.01-1%)	14747	0.163	0.064	1IQR	0.025	Two-step
AgeSmk	IVRT	Total	14747	0.256	0.072	1IQR	0.025	Two-step
AgeSmk	Log transformation	Cohort	16396	0.108991	0.052564	3IQR	0.025	Two-step
AgeSmk	Log transformation	MAF 5-50% - HI	16396	0.014567	0.009351	3IQR	0.025	Two-step
AgeSmk	Log transformation	MAF 5-50% - LO	16396	-0.006774	0.021127	3IQR	0.025	Two-step
AgeSmk	Log transformation	MAF 1-5% - HI	16396	0.000525	0.009481	3IQR	0.025	Two-step
AgeSmk	Log transformation	MAF 1-5% - LO	16396	0.074784	0.034185	3IQR	0.025	Two-step
AgeSmk	Log transformation	MAF 0.1-1%	16396	-0.002894	0.041238	3IQR	0.025	Two-step
AgeSmk	Log transformation	MAF 0.01-0.1%	16396	0.169426	0.043051	3IQR	0.025	Two-step
AgeSmk	Log transformation	Common (MAF 1-5%)	16396	0.083	0.036	3IQR	0.025	Two-step
AgeSmk	Log transformation	Rare (MAF 0.01-1%)	16396	0.167	0.052	3IQR	0.025	Two-step
AgeSmk	Log transformation	Total	16396	0.25	0.061	3IQR	0.025	Two-step
AgeSmk	Log transformation	Cohort	16396	0.10882	0.052533	3IQR	0.025	Two-step
AgeSmk	Log transformation	MAF 5-50% - HI	16396	0.014585	0.009364	3IQR	0.025	Two-step
AgeSmk	Log transformation	MAF 5-50% - LO	16396	-0.007044	0.021144	3IQR	0.025	Two-step
AgeSmk	Log transformation	MAF 1-5% - HI	16396	0.000585	0.009491	3IQR	0.025	Two-step
AgeSmk	Log transformation	MAF 1-5% - LO	16396	0.075827	0.034181	3IQR	0.025	Two-step
AgeSmk	Log transformation	MAF 0.1-1%	16396	0.003286	0.041212	3IQR	0.025	Two-step
AgeSmk	Log transformation	MAF 0.01-0.1%	16396	0.129689	0.041093	3IQR	0.025	Two-step
AgeSmk	Log transformation	Common (MAF 1-5%)	16396	0.084	0.036	3IQR	0.025	Two-step
AgeSmk	Log transformation	Rare (MAF 0.01-1%)	16396	0.133	0.052	3IQR	0.025	Two-step
AgeSmk	Log transformation	Total	16396	0.217	0.06	3IQR	0.025	Two-step
AgeSmk	Log transformation	Cohort	15974	0.10828	0.05246	2IQR	0.025	Two-step
AgeSmk	Log transformation	MAF 5-50% - HI	15974	0.01526	0.009687	2IQR	0.025	Two-step
AgeSmk	Log transformation	MAF 5-50% - LO	15974	-0.007516	0.021656	2IQR	0.025	Two-step
AgeSmk	Log transformation	MAF 1-5% - HI	15974	0.004221	0.009805	2IQR	0.025	Two-step
AgeSmk	Log transformation	MAF 1-5% - LO	15974	0.091255	0.035257	2IQR	0.025	Two-step
AgeSmk	Log transformation	MAF 0.1-1%	15974	-0.013914	0.041715	2IQR	0.025	Two-step
AgeSmk	Log transformation	MAF 0.01-0.1%	15974	0.211058	0.048264	2IQR	0.025	Two-step
AgeSmk	Log transformation	Common (MAF 1-5%)	15974	0.103	0.037	2IQR	0.025	Two-step
AgeSmk	Log transformation	Rare (MAF 0.01-1%)	15974	0.197	0.057	2IQR	0.025	Two-step
AgeSmk	Log transformation	Total	15974	0.3	0.065	2IQR	0.025	Two-step
AgeSmk	Log transformation	Cohort	15431	0.104628	0.050627	2IQR	0.025	Two-step
AgeSmk	Log transformation	MAF 5-50% - HI	15431	0.01127	0.009678	2IQR	0.025	Two-step
AgeSmk	Log transformation	MAF 5-50% - LO	15431	-0.011853	0.022472	2IQR	0.025	Two-step
AgeSmk	Log transformation	MAF 1-5% - HI	15431	0.007479	0.010242	2IQR	0.025	Two-step
AgeSmk	Log transformation	MAF 1-5% - LO	15431	0.0871	0.036467	2IQR	0.025	Two-step
AgeSmk	Log transformation	MAF 0.1-1%	15431	-0.030138	0.042985	2IQR	0.025	Two-step
AgeSmk	Log transformation	MAF 0.01-0.1%	15431	0.225815	0.049462	2IQR	0.025	Two-step
AgeSmk	Log transformation	Common (MAF 1-5%)	15431	0.094	0.039	2IQR	0.025	Two-step
AgeSmk	Log transformation	Rare (MAF 0.01-1%)	15431	0.196	0.059	2IQR	0.025	Two-step
AgeSmk	Log transformation	Total	15431	0.29	0.067	2IQR	0.025	Two-step
AgeSmk	Log transformation	Cohort	15657	0.111679	0.053969	1.5IQR	0.025	Two-step
AgeSmk	Log transformation	MAF 5-50% - HI	15657	0.016857	0.009898	1.5IQR	0.025	Two-step
AgeSmk	Log transformation	MAF 5-50% - LO	15657	-0.009389	0.021971	1.5IQR	0.025	Two-step
AgeSmk	Log transformation	MAF 1-5% - HI	15657	0.004428	0.00994	1.5IQR	0.025	Two-step
AgeSmk	Log transformation	MAF 1-5% - LO	15657	0.080535	0.035645	1.5IQR	0.025	Two-step
AgeSmk	Log transformation	MAF 0.1-1%	15657	-0.019648	0.040691	1.5IQR	0.025	Two-step
AgeSmk	Log transformation	MAF 0.01-0.1%	15657	0.251472	0.052442	1.5IQR	0.025	Two-step
AgeSmk	Log transformation	Common (MAF 1-5%)	15657	0.092	0.038	1.5IQR	0.025	Two-step
AgeSmk	Log transformation	Rare (MAF 0.01-1%)	15657	0.232	0.061	1.5IQR	0.025	Two-step
AgeSmk	Log transformation	Total	15657	0.324	0.069	1.5IQR	0.025	Two-step
AgeSmk	Log transformation	Cohort	15132	0.108281	0.052191	1.5IQR	0.025	Two-step
AgeSmk	Log transformation	MAF 5-50% - HI	15132	0.012888	0.00989	1.5IQR	0.025	Two-step
AgeSmk	Log transformation	MAF 5-50% - LO	15132	-0.015755	0.022774	1.5IQR	0.025	Two-step
AgeSmk	Log transformation	MAF 1-5% - HI	15132	0.007862	0.010385	1.5IQR	0.025	Two-step
AgeSmk	Log transformation	MAF 1-5% - LO	15132	0.07741	0.036885	1.5IQR	0.025	Two-step
AgeSmk	Log transformation	MAF 0.1-1%	15132	-0.039366	0.041117	1.5IQR	0.025	Two-step
AgeSmk	Log transformation	MAF 0.01-0.1%	15132	0.252813	0.053185	1.5IQR	0.025	Two-step
AgeSmk	Log transformation	Common (MAF 1-5%)	15132	0.082	0.039	1.5IQR	0.025	Two-step
AgeSmk	Log transformation	Rare (MAF 0.01-1%)	15132	0.213	0.061	1.5IQR	0.025	Two-step
AgeSmk	Log transformation	Total	15132	0.296	0.07	1.5IQR	0.025	Two-step
AgeSmk	Log transformation	Cohort	15246	0.114822	0.055634	1IQR	0.025	Two-step
AgeSmk	Log transformation	MAF 5-50% - HI	15246	0.016552	0.010088	1IQR	0.025	Two-step
AgeSmk	Log transformation	MAF 5-50% - LO	15246	-0.012115	0.022428	1IQR	0.025	Two-step
AgeSmk	Log transformation	MAF 1-5% - HI	15246	0.004841	0.010174	1IQR	0.025	Two-step
AgeSmk	Log transformation	MAF 1-5% - LO	15246	0.087097	0.036559	1IQR	0.025	Two-step
AgeSmk	Log transformation	MAF 0.1-1%	15246	-0.01463	0.042083	1IQR	0.025	Two-step
AgeSmk	Log transformation	MAF 0.01-0.1%	15246	0.2851	0.057025	1IQR	0.025	Two-step
AgeSmk	Log transformation	Common (MAF 1-5%)	15246	0.096	0.039	1IQR	0.025	Two-step
AgeSmk	Log transformation	Rare (MAF 0.01-1%)	15246	0.27	0.065	1IQR	0.025	Two-step
AgeSmk	Log transformation	Total	15246	0.367	0.073	1IQR	0.025	Two-step
AgeSmk	Log transformation	Cohort	14747	0.111375	0.053769	1IQR	0.025	Two-step
AgeSmk	Log transformation	MAF 5-50% - HI	14747	0.01303	0.01011	1IQR	0.025	Two-step
AgeSmk	Log transformation	MAF 5-50% - LO	14747	-0.016352	0.023282	1IQR	0.025	Two-step
AgeSmk	Log transformation	MAF 1-5% - HI	14747	0.008503	0.010634	1IQR	0.025	Two-step
AgeSmk	Log transformation	MAF 1-5% - LO	14747	0.079733	0.037708	1IQR	0.025	Two-step
AgeSmk	Log transformation	MAF 0.1-1%	14747	-0.030386	0.043129	1IQR	0.025	Two-step
AgeSmk	Log transformation	MAF 0.01-0.1%	14747	0.263671	0.057298	1IQR	0.025	Two-step
AgeSmk	Log transformation	Common (MAF 1-5%)	14747	0.085	0.04	1IQR	0.025	Two-step
AgeSmk	Log transformation	Rare (MAF 0.01-1%)	14747	0.233	0.066	1IQR	0.025	Two-step
AgeSmk	Log transformation	Total	14747	0.318	0.074	1IQR	0.025	Two-step
AgeSmk	Log transformation w/o outliers	Cohort	16232	0.112123	0.054695	3IQR	0.025	Two-step
AgeSmk	Log transformation w/o outliers	MAF 5-50% - HI	16232	0.014261	0.009363	3IQR	0.025	Two-step
AgeSmk	Log transformation w/o outliers	MAF 5-50% - LO	16232	0.005934	0.02131	3IQR	0.025	Two-step
AgeSmk	Log transformation w/o outliers	MAF 1-5% - HI	16232	-0.004536	0.00937	3IQR	0.025	Two-step
AgeSmk	Log transformation w/o outliers	MAF 1-5% - LO	16232	0.048852	0.03426	3IQR	0.025	Two-step
AgeSmk	Log transformation w/o outliers	MAF 0.1-1%	16232	0.021734	0.042089	3IQR	0.025	Two-step
AgeSmk	Log transformation w/o outliers	MAF 0.01-0.1%	16232	0.137258	0.041394	3IQR	0.025	Two-step
AgeSmk	Log transformation w/o outliers	Common (MAF 1-5%)	16232	0.065	0.036	3IQR	0.025	Two-step
AgeSmk	Log transformation w/o outliers	Rare (MAF 0.01-1%)	16232	0.159	0.052	3IQR	0.025	Two-step
AgeSmk	Log transformation w/o outliers	Total	16232	0.224	0.06	3IQR	0.025	Two-step
AgeSmk	Log transformation w/o outliers	Cohort	16232	0.112377	0.054837	3IQR	0.025	Two-step
AgeSmk	Log transformation w/o outliers	MAF 5-50% - HI	16232	0.014312	0.009369	3IQR	0.025	Two-step
AgeSmk	Log transformation w/o outliers	MAF 5-50% - LO	16232	0.005576	0.021303	3IQR	0.025	Two-step
AgeSmk	Log transformation w/o outliers	MAF 1-5% - HI	16232	-0.004413	0.009372	3IQR	0.025	Two-step
AgeSmk	Log transformation w/o outliers	MAF 1-5% - LO	16232	0.049767	0.034214	3IQR	0.025	Two-step
AgeSmk	Log transformation w/o outliers	MAF 0.1-1%	16232	0.023249	0.041889	3IQR	0.025	Two-step
AgeSmk	Log transformation w/o outliers	MAF 0.01-0.1%	16232	0.118766	0.040553	3IQR	0.025	Two-step
AgeSmk	Log transformation w/o outliers	Common (MAF 1-5%)	16232	0.065	0.036	3IQR	0.025	Two-step
AgeSmk	Log transformation w/o outliers	Rare (MAF 0.01-1%)	16232	0.142	0.052	3IQR	0.025	Two-step
AgeSmk	Log transformation w/o outliers	Total	16232	0.207	0.06	3IQR	0.025	Two-step
AgeSmk	Log transformation w/o outliers	Cohort	15813	0.111224	0.054644	2IQR	0.025	Two-step
AgeSmk	Log transformation w/o outliers	MAF 5-50% - HI	15813	0.014896	0.009706	2IQR	0.025	Two-step
AgeSmk	Log transformation w/o outliers	MAF 5-50% - LO	15813	0.009456	0.021901	2IQR	0.025	Two-step
AgeSmk	Log transformation w/o outliers	MAF 1-5% - HI	15813	0.000658	0.009785	2IQR	0.025	Two-step
AgeSmk	Log transformation w/o outliers	MAF 1-5% - LO	15813	0.065993	0.035315	2IQR	0.025	Two-step
AgeSmk	Log transformation w/o outliers	MAF 0.1-1%	15813	0.004458	0.042467	2IQR	0.025	Two-step
AgeSmk	Log transformation w/o outliers	MAF 0.01-0.1%	15813	0.151712	0.045441	2IQR	0.025	Two-step
AgeSmk	Log transformation w/o outliers	Common (MAF 1-5%)	15813	0.091	0.038	2IQR	0.025	Two-step
AgeSmk	Log transformation w/o outliers	Rare (MAF 0.01-1%)	15813	0.156	0.056	2IQR	0.025	Two-step
AgeSmk	Log transformation w/o outliers	Total	15813	0.247	0.064	2IQR	0.025	Two-step
AgeSmk	Log transformation w/o outliers	Cohort	15281	0.103855	0.051081	2IQR	0.025	Two-step
AgeSmk	Log transformation w/o outliers	MAF 5-50% - HI	15281	0.014327	0.009913	2IQR	0.025	Two-step
AgeSmk	Log transformation w/o outliers	MAF 5-50% - LO	15281	0.008149	0.022812	2IQR	0.025	Two-step
AgeSmk	Log transformation w/o outliers	MAF 1-5% - HI	15281	0.000805	0.010224	2IQR	0.025	Two-step
AgeSmk	Log transformation w/o outliers	MAF 1-5% - LO	15281	0.059926	0.036652	2IQR	0.025	Two-step
AgeSmk	Log transformation w/o outliers	MAF 0.1-1%	15281	-0.015462	0.043695	2IQR	0.025	Two-step
AgeSmk	Log transformation w/o outliers	MAF 0.01-0.1%	15281	0.183296	0.047432	2IQR	0.025	Two-step
AgeSmk	Log transformation w/o outliers	Common (MAF 1-5%)	15281	0.083	0.039	2IQR	0.025	Two-step
AgeSmk	Log transformation w/o outliers	Rare (MAF 0.01-1%)	15281	0.168	0.058	2IQR	0.025	Two-step
AgeSmk	Log transformation w/o outliers	Total	15281	0.251	0.066	2IQR	0.025	Two-step
AgeSmk	Log transformation w/o outliers	Cohort	15497	0.112605	0.055134	1.5IQR	0.025	Two-step
AgeSmk	Log transformation w/o outliers	MAF 5-50% - HI	15497	0.01704	0.009972	1.5IQR	0.025	Two-step
AgeSmk	Log transformation w/o outliers	MAF 5-50% - LO	15497	0.011287	0.022326	1.5IQR	0.025	Two-step
AgeSmk	Log transformation w/o outliers	MAF 1-5% - HI	15497	-0.000962	0.009858	1.5IQR	0.025	Two-step
AgeSmk	Log transformation w/o outliers	MAF 1-5% - LO	15497	0.055275	0.035824	1.5IQR	0.025	Two-step
AgeSmk	Log transformation w/o outliers	MAF 0.1-1%	15497	-0.009311	0.041936	1.5IQR	0.025	Two-step
AgeSmk	Log transformation w/o outliers	MAF 0.01-0.1%	15497	0.154818	0.048295	1.5IQR	0.025	Two-step
AgeSmk	Log transformation w/o outliers	Common (MAF 1-5%)	15497	0.083	0.038	1.5IQR	0.025	Two-step
AgeSmk	Log transformation w/o outliers	Rare (MAF 0.01-1%)	15497	0.146	0.058	1.5IQR	0.025	Two-step
AgeSmk	Log transformation w/o outliers	Total	15497	0.228	0.066	1.5IQR	0.025	Two-step
AgeSmk	Log transformation w/o outliers	Cohort	14983	0.10575	0.0517	1.5IQR	0.025	Two-step
AgeSmk	Log transformation w/o outliers	MAF 5-50% - HI	14983	0.016388	0.010167	1.5IQR	0.025	Two-step
AgeSmk	Log transformation w/o outliers	MAF 5-50% - LO	14983	0.008897	0.023204	1.5IQR	0.025	Two-step
AgeSmk	Log transformation w/o outliers	MAF 1-5% - HI	14983	-0.000312	0.010314	1.5IQR	0.025	Two-step
AgeSmk	Log transformation w/o outliers	MAF 1-5% - LO	14983	0.050654	0.037183	1.5IQR	0.025	Two-step
AgeSmk	Log transformation w/o outliers	MAF 0.1-1%	14983	-0.036174	0.042434	1.5IQR	0.025	Two-step
AgeSmk	Log transformation w/o outliers	MAF 0.01-0.1%	14983	0.17655	0.049971	1.5IQR	0.025	Two-step
AgeSmk	Log transformation w/o outliers	Common (MAF 1-5%)	14983	0.076	0.04	1.5IQR	0.025	Two-step
AgeSmk	Log transformation w/o outliers	Rare (MAF 0.01-1%)	14983	0.14	0.06	1.5IQR	0.025	Two-step
AgeSmk	Log transformation w/o outliers	Total	14983	0.216	0.068	1.5IQR	0.025	Two-step
AgeSmk	Log transformation w/o outliers	Cohort	15090	0.110572	0.054512	1IQR	0.025	Two-step
AgeSmk	Log transformation w/o outliers	MAF 5-50% - HI	15090	0.017191	0.010238	1IQR	0.025	Two-step
AgeSmk	Log transformation w/o outliers	MAF 5-50% - LO	15090	0.007176	0.022945	1IQR	0.025	Two-step
AgeSmk	Log transformation w/o outliers	MAF 1-5% - HI	15090	-0.00274	0.010047	1IQR	0.025	Two-step
AgeSmk	Log transformation w/o outliers	MAF 1-5% - LO	15090	0.064607	0.036892	1IQR	0.025	Two-step
AgeSmk	Log transformation w/o outliers	MAF 0.1-1%	15090	-0.009832	0.043156	1IQR	0.025	Two-step
AgeSmk	Log transformation w/o outliers	MAF 0.01-0.1%	15090	0.191383	0.05315	1IQR	0.025	Two-step
AgeSmk	Log transformation w/o outliers	Common (MAF 1-5%)	15090	0.086	0.039	1IQR	0.025	Two-step
AgeSmk	Log transformation w/o outliers	Rare (MAF 0.01-1%)	15090	0.182	0.063	1IQR	0.025	Two-step
AgeSmk	Log transformation w/o outliers	Total	15090	0.268	0.07	1IQR	0.025	Two-step
AgeSmk	Log transformation w/o outliers	Cohort	14602	0.104288	0.05124	1IQR	0.025	Two-step
AgeSmk	Log transformation w/o outliers	MAF 5-50% - HI	14602	0.016897	0.010472	1IQR	0.025	Two-step
AgeSmk	Log transformation w/o outliers	MAF 5-50% - LO	14602	0.006526	0.02386	1IQR	0.025	Two-step
AgeSmk	Log transformation w/o outliers	MAF 1-5% - HI	14602	-0.000832	0.010533	1IQR	0.025	Two-step
AgeSmk	Log transformation w/o outliers	MAF 1-5% - LO	14602	0.057473	0.038179	1IQR	0.025	Two-step
AgeSmk	Log transformation w/o outliers	MAF 0.1-1%	14602	-0.030118	0.044151	1IQR	0.025	Two-step
AgeSmk	Log transformation w/o outliers	MAF 0.01-0.1%	14602	0.190477	0.05449	1IQR	0.025	Two-step
AgeSmk	Log transformation w/o outliers	Common (MAF 1-5%)	14602	0.08	0.041	1IQR	0.025	Two-step
AgeSmk	Log transformation w/o outliers	Rare (MAF 0.01-1%)	14602	0.16	0.064	1IQR	0.025	Two-step
AgeSmk	Log transformation w/o outliers	Total	14602	0.24	0.072	1IQR	0.025	Two-step
CigDay	IVRT	Cohort	17250	0.140005	0.057571	3IQR	0.05	Two-step
CigDay	IVRT	MAF 5-50% - HI	17250	0.013706	0.008877	3IQR	0.05	Two-step
CigDay	IVRT	MAF 5-50% - LO	17250	0.081793	0.020601	3IQR	0.05	Two-step
CigDay	IVRT	MAF 1-5% - HI	17250	-0.011735	0.008228	3IQR	0.05	Two-step
CigDay	IVRT	MAF 1-5% - LO	17250	-0.014242	0.030605	3IQR	0.05	Two-step
CigDay	IVRT	MAF 0.1-1%	17250	0.073495	0.04026	3IQR	0.05	Two-step
CigDay	IVRT	MAF 0.01-0.1%	17250	0.003707	0.032985	3IQR	0.05	Two-step
CigDay	IVRT	Common (MAF 1-5%)	17250	0.07	0.033	3IQR	0.05	Two-step
CigDay	IVRT	Rare (MAF 0.01-1%)	17250	0.077	0.044	3IQR	0.05	Two-step
CigDay	IVRT	Total	17250	0.147	0.051	3IQR	0.05	Two-step
CigDay	IVRT	Cohort	16433	0.137579	0.057396	3IQR	0.025	Two-step
CigDay	IVRT	MAF 5-50% - HI	16433	0.00969	0.009143	3IQR	0.025	Two-step
CigDay	IVRT	MAF 5-50% - LO	16433	0.097157	0.021977	3IQR	0.025	Two-step
CigDay	IVRT	MAF 1-5% - HI	16433	-0.008166	0.008964	3IQR	0.025	Two-step
CigDay	IVRT	MAF 1-5% - LO	16433	-0.013368	0.032242	3IQR	0.025	Two-step
CigDay	IVRT	MAF 0.1-1%	16433	0.046358	0.041176	3IQR	0.025	Two-step
CigDay	IVRT	MAF 0.01-0.1%	16433	-0.021216	0.033142	3IQR	0.025	Two-step
CigDay	IVRT	Common (MAF 1-5%)	16433	0.085	0.035	3IQR	0.025	Two-step
CigDay	IVRT	Rare (MAF 0.01-1%)	16433	0.025	0.045	3IQR	0.025	Two-step
CigDay	IVRT	Total	16433	0.11	0.052	3IQR	0.025	Two-step
CigDay	IVRT	Cohort	16785	0.124443	0.052396	2IQR	0.05	Two-step
CigDay	IVRT	MAF 5-50% - HI	16785	0.012771	0.009216	2IQR	0.05	Two-step
CigDay	IVRT	MAF 5-50% - LO	16785	0.091202	0.021523	2IQR	0.05	Two-step
CigDay	IVRT	MAF 1-5% - HI	16785	-0.013642	0.008316	2IQR	0.05	Two-step
CigDay	IVRT	MAF 1-5% - LO	16785	-0.017109	0.032081	2IQR	0.05	Two-step
CigDay	IVRT	MAF 0.1-1%	16785	0.082531	0.04275	2IQR	0.05	Two-step
CigDay	IVRT	MAF 0.01-0.1%	16785	-0.017439	0.036522	2IQR	0.05	Two-step
CigDay	IVRT	Common (MAF 1-5%)	16785	0.073	0.034	2IQR	0.05	Two-step
CigDay	IVRT	Rare (MAF 0.01-1%)	16785	0.065	0.048	2IQR	0.05	Two-step
CigDay	IVRT	Total	16785	0.138	0.054	2IQR	0.05	Two-step
CigDay	IVRT	Cohort	16137	0.124076	0.052364	2IQR	0.025	Two-step
CigDay	IVRT	MAF 5-50% - HI	16137	0.010723	0.009496	2IQR	0.025	Two-step
CigDay	IVRT	MAF 5-50% - LO	16137	0.09758	0.022453	2IQR	0.025	Two-step
CigDay	IVRT	MAF 1-5% - HI	16137	-0.009349	0.009003	2IQR	0.025	Two-step
CigDay	IVRT	MAF 1-5% - LO	16137	-0.017258	0.033375	2IQR	0.025	Two-step
CigDay	IVRT	MAF 0.1-1%	16137	0.071456	0.043574	2IQR	0.025	Two-step
CigDay	IVRT	MAF 0.01-0.1%	16137	-0.055394	0.036131	2IQR	0.025	Two-step
CigDay	IVRT	Common (MAF 1-5%)	16137	0.082	0.036	2IQR	0.025	Two-step
CigDay	IVRT	Rare (MAF 0.01-1%)	16137	0.016	0.049	2IQR	0.025	Two-step
CigDay	IVRT	Total	16137	0.098	0.055	2IQR	0.025	Two-step
CigDay	IVRT	Cohort	16447	0.124928	0.054009	1.5IQR	0.05	Two-step
CigDay	IVRT	MAF 5-50% - HI	16447	0.010538	0.009255	1.5IQR	0.05	Two-step
CigDay	IVRT	MAF 5-50% - LO	16447	0.088815	0.021912	1.5IQR	0.05	Two-step
CigDay	IVRT	MAF 1-5% - HI	16447	-0.014607	0.008544	1.5IQR	0.05	Two-step
CigDay	IVRT	MAF 1-5% - LO	16447	-0.014898	0.032688	1.5IQR	0.05	Two-step
CigDay	IVRT	MAF 0.1-1%	16447	0.08901	0.043465	1.5IQR	0.05	Two-step
CigDay	IVRT	MAF 0.01-0.1%	16447	-0.003059	0.039482	1.5IQR	0.05	Two-step
CigDay	IVRT	Common (MAF 1-5%)	16447	0.07	0.035	1.5IQR	0.05	Two-step
CigDay	IVRT	Rare (MAF 0.01-1%)	16447	0.086	0.051	1.5IQR	0.05	Two-step
CigDay	IVRT	Total	16447	0.156	0.057	1.5IQR	0.05	Two-step
CigDay	IVRT	Cohort	15821	0.123853	0.053724	1.5IQR	0.025	Two-step
CigDay	IVRT	MAF 5-50% - HI	15821	0.009565	0.009575	1.5IQR	0.025	Two-step
CigDay	IVRT	MAF 5-50% - LO	15821	0.093266	0.022827	1.5IQR	0.025	Two-step
CigDay	IVRT	MAF 1-5% - HI	15821	-0.010076	0.009228	1.5IQR	0.025	Two-step
CigDay	IVRT	MAF 1-5% - LO	15821	-0.01549	0.034044	1.5IQR	0.025	Two-step
CigDay	IVRT	MAF 0.1-1%	15821	0.081304	0.044641	1.5IQR	0.025	Two-step
CigDay	IVRT	MAF 0.01-0.1%	15821	-0.043405	0.038903	1.5IQR	0.025	Two-step
CigDay	IVRT	Common (MAF 1-5%)	15821	0.077	0.036	1.5IQR	0.025	Two-step
CigDay	IVRT	Rare (MAF 0.01-1%)	15821	0.038	0.051	1.5IQR	0.025	Two-step
CigDay	IVRT	Total	15821	0.115	0.058	1.5IQR	0.025	Two-step
CigDay	IVRT	Cohort	16027	0.123509	0.053985	1IQR	0.05	Two-step
CigDay	IVRT	MAF 5-50% - HI	16027	0.011824	0.00947	1IQR	0.05	Two-step
CigDay	IVRT	MAF 5-50% - LO	16027	0.087042	0.022438	1IQR	0.05	Two-step
CigDay	IVRT	MAF 1-5% - HI	16027	-0.018781	0.008922	1IQR	0.05	Two-step
CigDay	IVRT	MAF 1-5% - LO	16027	-0.005678	0.033785	1IQR	0.05	Two-step
CigDay	IVRT	MAF 0.1-1%	16027	0.090019	0.044395	1IQR	0.05	Two-step
CigDay	IVRT	MAF 0.01-0.1%	16027	0.019874	0.043672	1IQR	0.05	Two-step
CigDay	IVRT	Common (MAF 1-5%)	16027	0.074	0.036	1IQR	0.05	Two-step
CigDay	IVRT	Rare (MAF 0.01-1%)	16027	0.11	0.055	1IQR	0.05	Two-step
CigDay	IVRT	Total	16027	0.184	0.061	1IQR	0.05	Two-step
CigDay	IVRT	Cohort	15425	0.120294	0.052983	1IQR	0.025	Two-step
CigDay	IVRT	MAF 5-50% - HI	15425	0.011023	0.009842	1IQR	0.025	Two-step
CigDay	IVRT	MAF 5-50% - LO	15425	0.092246	0.023435	1IQR	0.025	Two-step
CigDay	IVRT	MAF 1-5% - HI	15425	-0.015151	0.009472	1IQR	0.025	Two-step
CigDay	IVRT	MAF 1-5% - LO	15425	-0.000816	0.035208	1IQR	0.025	Two-step
CigDay	IVRT	MAF 0.1-1%	15425	0.083064	0.046159	1IQR	0.025	Two-step
CigDay	IVRT	MAF 0.01-0.1%	15425	-0.024022	0.043361	1IQR	0.025	Two-step
CigDay	IVRT	Common (MAF 1-5%)	15425	0.087	0.038	1IQR	0.025	Two-step
CigDay	IVRT	Rare (MAF 0.01-1%)	15425	0.059	0.056	1IQR	0.025	Two-step
CigDay	IVRT	Total	15425	0.146	0.062	1IQR	0.025	Two-step
CigDay	Log transformation	Cohort	17250	0.140005	0.057571	3IQR	0.05	Two-step
CigDay	Log transformation	MAF 5-50% - HI	17250	0.013706	0.008877	3IQR	0.05	Two-step
CigDay	Log transformation	MAF 5-50% - LO	17250	0.081793	0.020601	3IQR	0.05	Two-step
CigDay	Log transformation	MAF 1-5% - HI	17250	-0.011735	0.008228	3IQR	0.05	Two-step
CigDay	Log transformation	MAF 1-5% - LO	17250	-0.014242	0.030605	3IQR	0.05	Two-step
CigDay	Log transformation	MAF 0.1-1%	17250	0.073495	0.04026	3IQR	0.05	Two-step
CigDay	Log transformation	MAF 0.01-0.1%	17250	0.003707	0.032985	3IQR	0.05	Two-step
CigDay	Log transformation	Common (MAF 1-5%)	17250	0.07	0.033	3IQR	0.05	Two-step
CigDay	Log transformation	Rare (MAF 0.01-1%)	17250	0.077	0.044	3IQR	0.05	Two-step
CigDay	Log transformation	Total	17250	0.147	0.051	3IQR	0.05	Two-step
CigDay	Log transformation	Cohort	16433	0.137579	0.057396	3IQR	0.025	Two-step
CigDay	Log transformation	MAF 5-50% - HI	16433	0.00969	0.009143	3IQR	0.025	Two-step
CigDay	Log transformation	MAF 5-50% - LO	16433	0.097157	0.021977	3IQR	0.025	Two-step
CigDay	Log transformation	MAF 1-5% - HI	16433	-0.008166	0.008964	3IQR	0.025	Two-step
CigDay	Log transformation	MAF 1-5% - LO	16433	-0.013368	0.032242	3IQR	0.025	Two-step
CigDay	Log transformation	MAF 0.1-1%	16433	0.046358	0.041176	3IQR	0.025	Two-step
CigDay	Log transformation	MAF 0.01-0.1%	16433	-0.021216	0.033142	3IQR	0.025	Two-step
CigDay	Log transformation	Common (MAF 1-5%)	16433	0.085	0.035	3IQR	0.025	Two-step
CigDay	Log transformation	Rare (MAF 0.01-1%)	16433	0.025	0.045	3IQR	0.025	Two-step
CigDay	Log transformation	Total	16433	0.11	0.052	3IQR	0.025	Two-step
CigDay	Log transformation	Cohort	16785	0.124443	0.052396	2IQR	0.05	Two-step
CigDay	Log transformation	MAF 5-50% - HI	16785	0.012771	0.009216	2IQR	0.05	Two-step
CigDay	Log transformation	MAF 5-50% - LO	16785	0.091202	0.021523	2IQR	0.05	Two-step
CigDay	Log transformation	MAF 1-5% - HI	16785	-0.013642	0.008316	2IQR	0.05	Two-step
CigDay	Log transformation	MAF 1-5% - LO	16785	-0.017109	0.032081	2IQR	0.05	Two-step
CigDay	Log transformation	MAF 0.1-1%	16785	0.082531	0.04275	2IQR	0.05	Two-step
CigDay	Log transformation	MAF 0.01-0.1%	16785	-0.017439	0.036522	2IQR	0.05	Two-step
CigDay	Log transformation	Common (MAF 1-5%)	16785	0.073	0.034	2IQR	0.05	Two-step
CigDay	Log transformation	Rare (MAF 0.01-1%)	16785	0.065	0.048	2IQR	0.05	Two-step
CigDay	Log transformation	Total	16785	0.138	0.054	2IQR	0.05	Two-step
CigDay	Log transformation	Cohort	16137	0.124076	0.052364	2IQR	0.025	Two-step
CigDay	Log transformation	MAF 5-50% - HI	16137	0.010723	0.009496	2IQR	0.025	Two-step
CigDay	Log transformation	MAF 5-50% - LO	16137	0.09758	0.022453	2IQR	0.025	Two-step
CigDay	Log transformation	MAF 1-5% - HI	16137	-0.009349	0.009003	2IQR	0.025	Two-step
CigDay	Log transformation	MAF 1-5% - LO	16137	-0.017258	0.033375	2IQR	0.025	Two-step
CigDay	Log transformation	MAF 0.1-1%	16137	0.071456	0.043574	2IQR	0.025	Two-step
CigDay	Log transformation	MAF 0.01-0.1%	16137	-0.055394	0.036131	2IQR	0.025	Two-step
CigDay	Log transformation	Common (MAF 1-5%)	16137	0.082	0.036	2IQR	0.025	Two-step
CigDay	Log transformation	Rare (MAF 0.01-1%)	16137	0.016	0.049	2IQR	0.025	Two-step
CigDay	Log transformation	Total	16137	0.098	0.055	2IQR	0.025	Two-step
CigDay	Log transformation	Cohort	16447	0.124928	0.054009	1.5IQR	0.05	Two-step
CigDay	Log transformation	MAF 5-50% - HI	16447	0.010538	0.009255	1.5IQR	0.05	Two-step
CigDay	Log transformation	MAF 5-50% - LO	16447	0.088815	0.021912	1.5IQR	0.05	Two-step
CigDay	Log transformation	MAF 1-5% - HI	16447	-0.014607	0.008544	1.5IQR	0.05	Two-step
CigDay	Log transformation	MAF 1-5% - LO	16447	-0.014898	0.032688	1.5IQR	0.05	Two-step
CigDay	Log transformation	MAF 0.1-1%	16447	0.08901	0.043465	1.5IQR	0.05	Two-step
CigDay	Log transformation	MAF 0.01-0.1%	16447	-0.003059	0.039482	1.5IQR	0.05	Two-step
CigDay	Log transformation	Common (MAF 1-5%)	16447	0.07	0.035	1.5IQR	0.05	Two-step
CigDay	Log transformation	Rare (MAF 0.01-1%)	16447	0.086	0.051	1.5IQR	0.05	Two-step
CigDay	Log transformation	Total	16447	0.156	0.057	1.5IQR	0.05	Two-step
CigDay	Log transformation	Cohort	15821	0.123853	0.053724	1.5IQR	0.025	Two-step
CigDay	Log transformation	MAF 5-50% - HI	15821	0.009565	0.009575	1.5IQR	0.025	Two-step
CigDay	Log transformation	MAF 5-50% - LO	15821	0.093266	0.022827	1.5IQR	0.025	Two-step
CigDay	Log transformation	MAF 1-5% - HI	15821	-0.010076	0.009228	1.5IQR	0.025	Two-step
CigDay	Log transformation	MAF 1-5% - LO	15821	-0.01549	0.034044	1.5IQR	0.025	Two-step
CigDay	Log transformation	MAF 0.1-1%	15821	0.081304	0.044641	1.5IQR	0.025	Two-step
CigDay	Log transformation	MAF 0.01-0.1%	15821	-0.043405	0.038903	1.5IQR	0.025	Two-step
CigDay	Log transformation	Common (MAF 1-5%)	15821	0.077	0.036	1.5IQR	0.025	Two-step
CigDay	Log transformation	Rare (MAF 0.01-1%)	15821	0.038	0.051	1.5IQR	0.025	Two-step
CigDay	Log transformation	Total	15821	0.115	0.058	1.5IQR	0.025	Two-step
CigDay	Log transformation	Cohort	16027	0.123509	0.053985	1IQR	0.05	Two-step
CigDay	Log transformation	MAF 5-50% - HI	16027	0.011824	0.00947	1IQR	0.05	Two-step
CigDay	Log transformation	MAF 5-50% - LO	16027	0.087042	0.022438	1IQR	0.05	Two-step
CigDay	Log transformation	MAF 1-5% - HI	16027	-0.018781	0.008922	1IQR	0.05	Two-step
CigDay	Log transformation	MAF 1-5% - LO	16027	-0.005678	0.033785	1IQR	0.05	Two-step
CigDay	Log transformation	MAF 0.1-1%	16027	0.090019	0.044395	1IQR	0.05	Two-step
CigDay	Log transformation	MAF 0.01-0.1%	16027	0.019874	0.043672	1IQR	0.05	Two-step
CigDay	Log transformation	Common (MAF 1-5%)	16027	0.074	0.036	1IQR	0.05	Two-step
CigDay	Log transformation	Rare (MAF 0.01-1%)	16027	0.11	0.055	1IQR	0.05	Two-step
CigDay	Log transformation	Total	16027	0.184	0.061	1IQR	0.05	Two-step
CigDay	Log transformation	Cohort	15425	0.120294	0.052983	1IQR	0.025	Two-step
CigDay	Log transformation	MAF 5-50% - HI	15425	0.011023	0.009842	1IQR	0.025	Two-step
CigDay	Log transformation	MAF 5-50% - LO	15425	0.092246	0.023435	1IQR	0.025	Two-step
CigDay	Log transformation	MAF 1-5% - HI	15425	-0.015151	0.009472	1IQR	0.025	Two-step
CigDay	Log transformation	MAF 1-5% - LO	15425	-0.000816	0.035208	1IQR	0.025	Two-step
CigDay	Log transformation	MAF 0.1-1%	15425	0.083064	0.046159	1IQR	0.025	Two-step
CigDay	Log transformation	MAF 0.01-0.1%	15425	-0.024022	0.043361	1IQR	0.025	Two-step
CigDay	Log transformation	Common (MAF 1-5%)	15425	0.087	0.038	1IQR	0.025	Two-step
CigDay	Log transformation	Rare (MAF 0.01-1%)	15425	0.059	0.056	1IQR	0.025	Two-step
CigDay	Log transformation	Total	15425	0.146	0.062	1IQR	0.025	Two-step
SmkCes	No transformation	Cohort	19967	0.086067	0.033791	3IQR	0.025	Two-step
SmkCes	No transformation	MAF 5-50% - HI	19967	0.015976	0.011207	3IQR	0.025	Two-step
SmkCes	No transformation	MAF 5-50% - LO	19967	0.043081	0.025474	3IQR	0.025	Two-step
SmkCes	No transformation	MAF 1-5% - HI	19967	-0.00987	0.010419	3IQR	0.025	Two-step
SmkCes	No transformation	MAF 1-5% - LO	19967	0.017386	0.040042	3IQR	0.025	Two-step
SmkCes	No transformation	MAF 0.1-1%	19967	0.000712	0.049044	3IQR	0.025	Two-step
SmkCes	No transformation	MAF 0.01-0.1%	19967	0.148115	0.050604	3IQR	0.025	Two-step
SmkCes	No transformation	Common (MAF 1-5%)	19967	0.067	0.043	3IQR	0.025	Two-step
SmkCes	No transformation	Rare (MAF 0.01-1%)	19967	0.149	0.062	3IQR	0.025	Two-step
SmkCes	No transformation	Total	19967	0.216	0.071	3IQR	0.025	Two-step
SmkCes	No transformation	Cohort	18987	0.092343	0.036543	3IQR	0.025	Two-step
SmkCes	No transformation	MAF 5-50% - HI	18987	0.013383	0.011772	3IQR	0.025	Two-step
SmkCes	No transformation	MAF 5-50% - LO	18987	0.048703	0.026895	3IQR	0.025	Two-step
SmkCes	No transformation	MAF 1-5% - HI	18987	-0.010334	0.010901	3IQR	0.025	Two-step
SmkCes	No transformation	MAF 1-5% - LO	18987	0.013747	0.042366	3IQR	0.025	Two-step
SmkCes	No transformation	MAF 0.1-1%	18987	0.017916	0.052709	3IQR	0.025	Two-step
SmkCes	No transformation	MAF 0.01-0.1%	18987	0.132074	0.052639	3IQR	0.025	Two-step
SmkCes	No transformation	Common (MAF 1-5%)	18987	0.065	0.045	3IQR	0.025	Two-step
SmkCes	No transformation	Rare (MAF 0.01-1%)	18987	0.149	0.065	3IQR	0.025	Two-step
SmkCes	No transformation	Total	18987	0.214	0.074	3IQR	0.025	Two-step
SmkCes	No transformation	Cohort	19438	0.083603	0.032974	2IQR	0.025	Two-step
SmkCes	No transformation	MAF 5-50% - HI	19438	0.014711	0.011457	2IQR	0.025	Two-step
SmkCes	No transformation	MAF 5-50% - LO	19438	0.047066	0.026233	2IQR	0.025	Two-step
SmkCes	No transformation	MAF 1-5% - HI	19438	-0.012882	0.010416	2IQR	0.025	Two-step
SmkCes	No transformation	MAF 1-5% - LO	19438	0.017125	0.041039	2IQR	0.025	Two-step
SmkCes	No transformation	MAF 0.1-1%	19438	-0.017945	0.049923	2IQR	0.025	Two-step
SmkCes	No transformation	MAF 0.01-0.1%	19438	0.19613	0.056922	2IQR	0.025	Two-step
SmkCes	No transformation	Common (MAF 1-5%)	19438	0.066	0.044	2IQR	0.025	Two-step
SmkCes	No transformation	Rare (MAF 0.01-1%)	19438	0.179	0.068	2IQR	0.025	Two-step
SmkCes	No transformation	Total	19438	0.245	0.076	2IQR	0.025	Two-step
SmkCes	No transformation	Cohort	18661	0.087924	0.034757	2IQR	0.025	Two-step
SmkCes	No transformation	MAF 5-50% - HI	18661	0.011723	0.011877	2IQR	0.025	Two-step
SmkCes	No transformation	MAF 5-50% - LO	18661	0.049887	0.027383	2IQR	0.025	Two-step
SmkCes	No transformation	MAF 1-5% - HI	18661	-0.011712	0.010821	2IQR	0.025	Two-step
SmkCes	No transformation	MAF 1-5% - LO	18661	0.014604	0.042998	2IQR	0.025	Two-step
SmkCes	No transformation	MAF 0.1-1%	18661	-0.003521	0.052668	2IQR	0.025	Two-step
SmkCes	No transformation	MAF 0.01-0.1%	18661	0.167447	0.057896	2IQR	0.025	Two-step
SmkCes	No transformation	Common (MAF 1-5%)	18661	0.064	0.045	2IQR	0.025	Two-step
SmkCes	No transformation	Rare (MAF 0.01-1%)	18661	0.163	0.07	2IQR	0.025	Two-step
SmkCes	No transformation	Total	18661	0.227	0.079	2IQR	0.025	Two-step
SmkCes	No transformation	Cohort	19072	0.085908	0.033962	1.5IQR	0.025	Two-step
SmkCes	No transformation	MAF 5-50% - HI	19072	0.015797	0.011693	1.5IQR	0.025	Two-step
SmkCes	No transformation	MAF 5-50% - LO	19072	0.054022	0.026777	1.5IQR	0.025	Two-step
SmkCes	No transformation	MAF 1-5% - HI	19072	-0.013393	0.010952	1.5IQR	0.025	Two-step
SmkCes	No transformation	MAF 1-5% - LO	19072	0.019647	0.041826	1.5IQR	0.025	Two-step
SmkCes	No transformation	MAF 0.1-1%	19072	-0.002497	0.051516	1.5IQR	0.025	Two-step
SmkCes	No transformation	MAF 0.01-0.1%	19072	0.198777	0.060676	1.5IQR	0.025	Two-step
SmkCes	No transformation	Common (MAF 1-5%)	19072	0.076	0.044	1.5IQR	0.025	Two-step
SmkCes	No transformation	Rare (MAF 0.01-1%)	19072	0.196	0.072	1.5IQR	0.025	Two-step
SmkCes	No transformation	Total	19072	0.273	0.08	1.5IQR	0.025	Two-step
SmkCes	No transformation	Cohort	18318	0.089677	0.03549	1.5IQR	0.025	Two-step
SmkCes	No transformation	MAF 5-50% - HI	18318	0.014092	0.012171	1.5IQR	0.025	Two-step
SmkCes	No transformation	MAF 5-50% - LO	18318	0.061985	0.027986	1.5IQR	0.025	Two-step
SmkCes	No transformation	MAF 1-5% - HI	18318	-0.013331	0.011371	1.5IQR	0.025	Two-step
SmkCes	No transformation	MAF 1-5% - LO	18318	0.010956	0.04382	1.5IQR	0.025	Two-step
SmkCes	No transformation	MAF 0.1-1%	18318	0.012898	0.054901	1.5IQR	0.025	Two-step
SmkCes	No transformation	MAF 0.01-0.1%	18318	0.164912	0.061606	1.5IQR	0.025	Two-step
SmkCes	No transformation	Common (MAF 1-5%)	18318	0.073	0.046	1.5IQR	0.025	Two-step
SmkCes	No transformation	Rare (MAF 0.01-1%)	18318	0.177	0.074	1.5IQR	0.025	Two-step
SmkCes	No transformation	Total	18318	0.25	0.082	1.5IQR	0.025	Two-step
SmkCes	No transformation	Cohort	18596	0.080946	0.032186	1IQR	0.025	Two-step
SmkCes	No transformation	MAF 5-50% - HI	18596	0.011619	0.012028	1IQR	0.025	Two-step
SmkCes	No transformation	MAF 5-50% - LO	18596	0.053907	0.027585	1IQR	0.025	Two-step
SmkCes	No transformation	MAF 1-5% - HI	18596	-0.014025	0.011246	1IQR	0.025	Two-step
SmkCes	No transformation	MAF 1-5% - LO	18596	0.039066	0.043383	1IQR	0.025	Two-step
SmkCes	No transformation	MAF 0.1-1%	18596	0.008277	0.052868	1IQR	0.025	Two-step
SmkCes	No transformation	MAF 0.01-0.1%	18596	0.192851	0.065383	1IQR	0.025	Two-step
SmkCes	No transformation	Common (MAF 1-5%)	18596	0.09	0.046	1IQR	0.025	Two-step
SmkCes	No transformation	Rare (MAF 0.01-1%)	18596	0.201	0.077	1IQR	0.025	Two-step
SmkCes	No transformation	Total	18596	0.291	0.084	1IQR	0.025	Two-step
SmkCes	No transformation	Cohort	17871	0.084581	0.033635	1IQR	0.025	Two-step
SmkCes	No transformation	MAF 5-50% - HI	17871	0.008969	0.012525	1IQR	0.025	Two-step
SmkCes	No transformation	MAF 5-50% - LO	17871	0.05669	0.028779	1IQR	0.025	Two-step
SmkCes	No transformation	MAF 1-5% - HI	17871	-0.013579	0.011827	1IQR	0.025	Two-step
SmkCes	No transformation	MAF 1-5% - LO	17871	0.023138	0.045297	1IQR	0.025	Two-step
SmkCes	No transformation	MAF 0.1-1%	17871	0.032172	0.056708	1IQR	0.025	Two-step
SmkCes	No transformation	MAF 0.01-0.1%	17871	0.146833	0.066596	1IQR	0.025	Two-step
SmkCes	No transformation	Common (MAF 1-5%)	17871	0.075	0.048	1IQR	0.025	Two-step
SmkCes	No transformation	Rare (MAF 0.01-1%)	17871	0.177	0.079	1IQR	0.025	Two-step
SmkCes	No transformation	Total	17871	0.252	0.087	1IQR	0.025	Two-step
SmkInit	No transformation	Cohort	29749	0.289972	0.091833	3IQR	0.025	Two-step
SmkInit	No transformation	MAF 5-50% - HI	29749	0.028024	0.009284	3IQR	0.025	Two-step
SmkInit	No transformation	MAF 5-50% - LO	29749	0.079715	0.020269	3IQR	0.025	Two-step
SmkInit	No transformation	MAF 1-5% - HI	29749	0.00828	0.008986	3IQR	0.025	Two-step
SmkInit	No transformation	MAF 1-5% - LO	29749	0.062547	0.03037	3IQR	0.025	Two-step
SmkInit	No transformation	MAF 0.1-1%	29749	0.05822	0.038615	3IQR	0.025	Two-step
SmkInit	No transformation	MAF 0.01-0.1%	29749	0.009881	0.038797	3IQR	0.025	Two-step
SmkInit	No transformation	Common (MAF 1-5%)	29749	0.182	0.035	3IQR	0.025	Two-step
SmkInit	No transformation	Rare (MAF 0.01-1%)	29749	0.069	0.049	3IQR	0.025	Two-step
SmkInit	No transformation	Total	29749	0.251	0.057	3IQR	0.025	Two-step
SmkInit	No transformation	Cohort	27876	0.288408	0.091875	3IQR	0.025	Two-step
SmkInit	No transformation	MAF 5-50% - HI	27876	0.025308	0.009773	3IQR	0.025	Two-step
SmkInit	No transformation	MAF 5-50% - LO	27876	0.080712	0.021586	3IQR	0.025	Two-step
SmkInit	No transformation	MAF 1-5% - HI	27876	0.009982	0.009777	3IQR	0.025	Two-step
SmkInit	No transformation	MAF 1-5% - LO	27876	0.05085	0.032258	3IQR	0.025	Two-step
SmkInit	No transformation	MAF 0.1-1%	27876	0.064659	0.041451	3IQR	0.025	Two-step
SmkInit	No transformation	MAF 0.01-0.1%	27876	-0.028571	0.039481	3IQR	0.025	Two-step
SmkInit	No transformation	Common (MAF 1-5%)	27876	0.169	0.037	3IQR	0.025	Two-step
SmkInit	No transformation	Rare (MAF 0.01-1%)	27876	0.037	0.051	3IQR	0.025	Two-step
SmkInit	No transformation	Total	27876	0.206	0.059	3IQR	0.025	Two-step
SmkInit	No transformation	Cohort	28949	0.29217	0.092783	2IQR	0.025	Two-step
SmkInit	No transformation	MAF 5-50% - HI	28949	0.032708	0.009726	2IQR	0.025	Two-step
SmkInit	No transformation	MAF 5-50% - LO	28949	0.072765	0.020596	2IQR	0.025	Two-step
SmkInit	No transformation	MAF 1-5% - HI	28949	0.010268	0.009268	2IQR	0.025	Two-step
SmkInit	No transformation	MAF 1-5% - LO	28949	0.071708	0.031257	2IQR	0.025	Two-step
SmkInit	No transformation	MAF 0.1-1%	28949	0.038243	0.039018	2IQR	0.025	Two-step
SmkInit	No transformation	MAF 0.01-0.1%	28949	0.031553	0.043382	2IQR	0.025	Two-step
SmkInit	No transformation	Common (MAF 1-5%)	28949	0.191	0.036	2IQR	0.025	Two-step
SmkInit	No transformation	Rare (MAF 0.01-1%)	28949	0.071	0.053	2IQR	0.025	Two-step
SmkInit	No transformation	Total	28949	0.262	0.061	2IQR	0.025	Two-step
SmkInit	No transformation	Cohort	27394	0.288053	0.09207	2IQR	0.025	Two-step
SmkInit	No transformation	MAF 5-50% - HI	27394	0.030059	0.010142	2IQR	0.025	Two-step
SmkInit	No transformation	MAF 5-50% - LO	27394	0.07313	0.021743	2IQR	0.025	Two-step
SmkInit	No transformation	MAF 1-5% - HI	27394	0.011501	0.009983	2IQR	0.025	Two-step
SmkInit	No transformation	MAF 1-5% - LO	27394	0.060876	0.032899	2IQR	0.025	Two-step
SmkInit	No transformation	MAF 0.1-1%	27394	0.042939	0.041718	2IQR	0.025	Two-step
SmkInit	No transformation	MAF 0.01-0.1%	27394	-0.014605	0.043615	2IQR	0.025	Two-step
SmkInit	No transformation	Common (MAF 1-5%)	27394	0.178	0.037	2IQR	0.025	Two-step
SmkInit	No transformation	Rare (MAF 0.01-1%)	27394	0.029	0.055	2IQR	0.025	Two-step
SmkInit	No transformation	Total	27394	0.207	0.062	2IQR	0.025	Two-step
SmkInit	No transformation	Cohort	28473	0.291118	0.092677	1.5IQR	0.025	Two-step
SmkInit	No transformation	MAF 5-50% - HI	28473	0.032619	0.009828	1.5IQR	0.025	Two-step
SmkInit	No transformation	MAF 5-50% - LO	28473	0.06863	0.020751	1.5IQR	0.025	Two-step
SmkInit	No transformation	MAF 1-5% - HI	28473	0.01059	0.009406	1.5IQR	0.025	Two-step
SmkInit	No transformation	MAF 1-5% - LO	28473	0.066127	0.031547	1.5IQR	0.025	Two-step
SmkInit	No transformation	MAF 0.1-1%	28473	0.044695	0.03948	1.5IQR	0.025	Two-step
SmkInit	No transformation	MAF 0.01-0.1%	28473	0.051193	0.046642	1.5IQR	0.025	Two-step
SmkInit	No transformation	Common (MAF 1-5%)	28473	0.181	0.036	1.5IQR	0.025	Two-step
SmkInit	No transformation	Rare (MAF 0.01-1%)	28473	0.098	0.056	1.5IQR	0.025	Two-step
SmkInit	No transformation	Total	28473	0.279	0.064	1.5IQR	0.025	Two-step
SmkInit	No transformation	Cohort	26951	0.287921	0.092233	1.5IQR	0.025	Two-step
SmkInit	No transformation	MAF 5-50% - HI	26951	0.028237	0.010194	1.5IQR	0.025	Two-step
SmkInit	No transformation	MAF 5-50% - LO	26951	0.070622	0.02197	1.5IQR	0.025	Two-step
SmkInit	No transformation	MAF 1-5% - HI	26951	0.012816	0.010194	1.5IQR	0.025	Two-step
SmkInit	No transformation	MAF 1-5% - LO	26951	0.054564	0.033232	1.5IQR	0.025	Two-step
SmkInit	No transformation	MAF 0.1-1%	26951	0.056262	0.042691	1.5IQR	0.025	Two-step
SmkInit	No transformation	MAF 0.01-0.1%	26951	0.005903	0.046959	1.5IQR	0.025	Two-step
SmkInit	No transformation	Common (MAF 1-5%)	26951	0.169	0.038	1.5IQR	0.025	Two-step
SmkInit	No transformation	Rare (MAF 0.01-1%)	26951	0.063	0.058	1.5IQR	0.025	Two-step
SmkInit	No transformation	Total	26951	0.232	0.065	1.5IQR	0.025	Two-step
SmkInit	No transformation	Cohort	27824	0.292462	0.093262	1IQR	0.025	Two-step
SmkInit	No transformation	MAF 5-50% - HI	27824	0.034243	0.010022	1IQR	0.025	Two-step
SmkInit	No transformation	MAF 5-50% - LO	27824	0.074601	0.02129	1IQR	0.025	Two-step
SmkInit	No transformation	MAF 1-5% - HI	27824	0.01437	0.00965	1IQR	0.025	Two-step
SmkInit	No transformation	MAF 1-5% - LO	27824	0.05816	0.032005	1IQR	0.025	Two-step
SmkInit	No transformation	MAF 0.1-1%	27824	0.030741	0.039489	1IQR	0.025	Two-step
SmkInit	No transformation	MAF 0.01-0.1%	27824	0.076771	0.05006	1IQR	0.025	Two-step
SmkInit	No transformation	Common (MAF 1-5%)	27824	0.185	0.037	1IQR	0.025	Two-step
SmkInit	No transformation	Rare (MAF 0.01-1%)	27824	0.11	0.06	1IQR	0.025	Two-step
SmkInit	No transformation	Total	27824	0.295	0.067	1IQR	0.025	Two-step
SmkInit	No transformation	Cohort	26340	0.288173	0.092497	1IQR	0.025	Two-step
SmkInit	No transformation	MAF 5-50% - HI	26340	0.030183	0.010398	1IQR	0.025	Two-step
SmkInit	No transformation	MAF 5-50% - LO	26340	0.072001	0.022475	1IQR	0.025	Two-step
SmkInit	No transformation	MAF 1-5% - HI	26340	0.015148	0.010462	1IQR	0.025	Two-step
SmkInit	No transformation	MAF 1-5% - LO	26340	0.048226	0.03383	1IQR	0.025	Two-step
SmkInit	No transformation	MAF 0.1-1%	26340	0.048328	0.042986	1IQR	0.025	Two-step
SmkInit	No transformation	MAF 0.01-0.1%	26340	0.024152	0.050611	1IQR	0.025	Two-step
SmkInit	No transformation	Common (MAF 1-5%)	26340	0.169	0.038	1IQR	0.025	Two-step
SmkInit	No transformation	Rare (MAF 0.01-1%)	26340	0.074	0.062	1IQR	0.025	Two-step
SmkInit	No transformation	Total	26340	0.242	0.069	1IQR	0.025	Two-step
AgeSmk	IVRT	Cohort	15579	0.103451	0.050919	1IQR	0.05	CEU_6SD
AgeSmk	IVRT	MAF 5-50% - HI	15579	0.016162	0.009935	1IQR	0.05	CEU_6SD
AgeSmk	IVRT	MAF 5-50% - LO	15579	0.003994	0.022421	1IQR	0.05	CEU_6SD
AgeSmk	IVRT	MAF 1-5% - HI	15579	0.003365	0.010114	1IQR	0.05	CEU_6SD
AgeSmk	IVRT	MAF 1-5% - LO	15579	0.087035	0.036283	1IQR	0.05	CEU_6SD
AgeSmk	IVRT	MAF 0.1-1%	15579	-0.016968	0.042257	1IQR	0.05	CEU_6SD
AgeSmk	IVRT	MAF 0.01-0.1%	15579	0.204712	0.053591	1IQR	0.05	CEU_6SD
AgeSmk	IVRT	Common (MAF 1-5%)	15579	0.111	0.039	1IQR	0.05	CEU_6SD
AgeSmk	IVRT	Rare (MAF 0.01-1%)	15579	0.188	0.062	1IQR	0.05	CEU_6SD
AgeSmk	IVRT	Total	15579	0.298	0.07	1IQR	0.05	CEU_6SD
AgeSmk	IVRT	Cohort	15052	0.10053	0.049274	1IQR	0.025	CEU_6SD
AgeSmk	IVRT	MAF 5-50% - HI	15052	0.013613	0.009989	1IQR	0.025	CEU_6SD
AgeSmk	IVRT	MAF 5-50% - LO	15052	-0.004104	0.023184	1IQR	0.025	CEU_6SD
AgeSmk	IVRT	MAF 1-5% - HI	15052	0.005783	0.01053	1IQR	0.025	CEU_6SD
AgeSmk	IVRT	MAF 1-5% - LO	15052	0.083413	0.037535	1IQR	0.025	CEU_6SD
AgeSmk	IVRT	MAF 0.1-1%	15052	-0.03615	0.043293	1IQR	0.025	CEU_6SD
AgeSmk	IVRT	MAF 0.01-0.1%	15052	0.209187	0.054982	1IQR	0.025	CEU_6SD
AgeSmk	IVRT	Common (MAF 1-5%)	15052	0.099	0.04	1IQR	0.025	CEU_6SD
AgeSmk	IVRT	Rare (MAF 0.01-1%)	15052	0.173	0.064	1IQR	0.025	CEU_6SD
AgeSmk	IVRT	Total	15052	0.272	0.071	1IQR	0.025	CEU_6SD
CigDay	IVRT	Cohort	16380	0.121943	0.051838	1IQR	0.05	CEU_6SD
CigDay	IVRT	MAF 5-50% - HI	16380	0.006352	0.009449	1IQR	0.05	CEU_6SD
CigDay	IVRT	MAF 5-50% - LO	16380	0.095615	0.023148	1IQR	0.05	CEU_6SD
CigDay	IVRT	MAF 1-5% - HI	16380	-0.007792	0.009526	1IQR	0.05	CEU_6SD
CigDay	IVRT	MAF 1-5% - LO	16380	-0.009957	0.0346	1IQR	0.05	CEU_6SD
CigDay	IVRT	MAF 0.1-1%	16380	0.076474	0.045317	1IQR	0.05	CEU_6SD
CigDay	IVRT	MAF 0.01-0.1%	16380	-0.039926	0.042563	1IQR	0.05	CEU_6SD
CigDay	IVRT	Common (MAF 1-5%)	16380	0.084	0.037	1IQR	0.05	CEU_6SD
CigDay	IVRT	Rare (MAF 0.01-1%)	16380	0.037	0.055	1IQR	0.05	CEU_6SD
CigDay	IVRT	Total	16380	0.121	0.061	1IQR	0.05	CEU_6SD
CigDay	IVRT	Cohort	15748	0.12127	0.051603	1IQR	0.025	CEU_6SD
CigDay	IVRT	MAF 5-50% - HI	15748	0.0082	0.009508	1IQR	0.025	CEU_6SD
CigDay	IVRT	MAF 5-50% - LO	15748	0.09339	0.022964	1IQR	0.025	CEU_6SD
CigDay	IVRT	MAF 1-5% - HI	15748	-0.007778	0.009387	1IQR	0.025	CEU_6SD
CigDay	IVRT	MAF 1-5% - LO	15748	-0.006506	0.034389	1IQR	0.025	CEU_6SD
CigDay	IVRT	MAF 0.1-1%	15748	0.074943	0.04465	1IQR	0.025	CEU_6SD
CigDay	IVRT	MAF 0.01-0.1%	15748	-0.044087	0.041904	1IQR	0.025	CEU_6SD
CigDay	IVRT	Common (MAF 1-5%)	15748	0.087	0.037	1IQR	0.025	CEU_6SD
CigDay	IVRT	Rare (MAF 0.01-1%)	15748	0.031	0.054	1IQR	0.025	CEU_6SD
CigDay	IVRT	Total	15748	0.118	0.06	1IQR	0.025	CEU_6SD
SmkCes	No transformation	Cohort	18978	0.083	0.033	1IQR	0.05	CEU_6SD
SmkCes	No transformation	MAF 5-50% - HI	18978	0.014	0.012	1IQR	0.05	CEU_6SD
SmkCes	No transformation	MAF 5-50% - LO	18978	0.052	0.027	1IQR	0.05	CEU_6SD
SmkCes	No transformation	MAF 1-5% - HI	18978	-0.017	0.011	1IQR	0.05	CEU_6SD
SmkCes	No transformation	MAF 1-5% - LO	18978	0.032	0.042	1IQR	0.05	CEU_6SD
SmkCes	No transformation	MAF 0.1-1%	18978	-0.008	0.051	1IQR	0.05	CEU_6SD
SmkCes	No transformation	MAF 0.01-0.1%	18978	0.184	0.065	1IQR	0.05	CEU_6SD
SmkCes	No transformation	Common (MAF 1-5%)	18978	0.081	0.045	1IQR	0.05	CEU_6SD
SmkCes	No transformation	Rare (MAF 0.01-1%)	18978	0.176	0.075	1IQR	0.05	CEU_6SD
SmkCes	No transformation	Total	18978	0.257	0.083	1IQR	0.05	CEU_6SD
SmkCes	No transformation	Cohort	18223	0.087	0.034	1IQR	0.025	CEU_6SD
SmkCes	No transformation	MAF 5-50% - HI	18223	0.014	0.012	1IQR	0.025	CEU_6SD
SmkCes	No transformation	MAF 5-50% - LO	18223	0.055	0.028	1IQR	0.025	CEU_6SD
SmkCes	No transformation	MAF 1-5% - HI	18223	-0.015	0.011	1IQR	0.025	CEU_6SD
SmkCes	No transformation	MAF 1-5% - LO	18223	0.027	0.044	1IQR	0.025	CEU_6SD
SmkCes	No transformation	MAF 0.1-1%	18223	-0.004	0.054	1IQR	0.025	CEU_6SD
SmkCes	No transformation	MAF 0.01-0.1%	18223	0.152	0.066	1IQR	0.025	CEU_6SD
SmkCes	No transformation	Common (MAF 1-5%)	18223	0.08	0.047	1IQR	0.025	CEU_6SD
SmkCes	No transformation	Rare (MAF 0.01-1%)	18223	0.148	0.077	1IQR	0.025	CEU_6SD
SmkCes	No transformation	Total	18223	0.228	0.086	1IQR	0.025	CEU_6SD
SmkInit	No transformation	Cohort	28344	0.302	0.096	1IQR	0.05	CEU_6SD
SmkInit	No transformation	MAF 5-50% - HI	28344	0.028	0.01	1IQR	0.05	CEU_6SD
SmkInit	No transformation	MAF 5-50% - LO	28344	0.081	0.021	1IQR	0.05	CEU_6SD
SmkInit	No transformation	MAF 1-5% - HI	28344	0.012	0.01	1IQR	0.05	CEU_6SD
SmkInit	No transformation	MAF 1-5% - LO	28344	0.062	0.032	1IQR	0.05	CEU_6SD
SmkInit	No transformation	MAF 0.1-1%	28344	0.024	0.039	1IQR	0.05	CEU_6SD
SmkInit	No transformation	MAF 0.01-0.1%	28344	0.033	0.05	1IQR	0.05	CEU_6SD
SmkInit	No transformation	Common (MAF 1-5%)	28344	0.183	0.036	1IQR	0.05	CEU_6SD
SmkInit	No transformation	Rare (MAF 0.01-1%)	28344	0.056	0.058	1IQR	0.05	CEU_6SD
SmkInit	No transformation	Total	28344	0.239	0.064	1IQR	0.05	CEU_6SD
SmkInit	No transformation	Cohort	26812	0.299	0.095	1IQR	0.025	CEU_6SD
SmkInit	No transformation	MAF 5-50% - HI	26812	0.023	0.01	1IQR	0.025	CEU_6SD
SmkInit	No transformation	MAF 5-50% - LO	26812	0.082	0.022	1IQR	0.025	CEU_6SD
SmkInit	No transformation	MAF 1-5% - HI	26812	0.015	0.01	1IQR	0.025	CEU_6SD
SmkInit	No transformation	MAF 1-5% - LO	26812	0.051	0.033	1IQR	0.025	CEU_6SD
SmkInit	No transformation	MAF 0.1-1%	26812	0.04	0.043	1IQR	0.025	CEU_6SD
SmkInit	No transformation	MAF 0.01-0.1%	26812	-0.028	0.05	1IQR	0.025	CEU_6SD
SmkInit	No transformation	Common (MAF 1-5%)	26812	0.172	0.037	1IQR	0.025	CEU_6SD
SmkInit	No transformation	Rare (MAF 0.01-1%)	26812	0.012	0.06	1IQR	0.025	CEU_6SD
SmkInit	No transformation	Total	26812	0.184	0.066	1IQR	0.025	CEU_6SD
Note. Two-step sample selection indicates sample selection procedure applied to main analysis, i.e., intial filtering based on the nearest neighbor algorithm followed by IQR filtering. CEU_6SD is the alternative selection strategy where individuals were assigned European ancestry when their PC1 and PC2 lie within 6SD of PC1-2 scores of CEU sample in 1000G.
